# Supplementary material
Source: publisher figshare collection journal article supplement (https://gsapubs.figshare.com/ndownloader/files/26338324)
Supplement: Supplementary file 1 [file 26338324]

## Sheet: G48502
Li, M., et al., 2021, Phanerozoic variation in dolomite abundance linked to oceanic anoxia: Geology, v. 49, https://doi.org/10.1130/G48502.1

## Sheet: Terreneuvian
Region	Section	dolostone (meter)	limestone (meter)	Reference	Dolomite abundance
Western Anti-Atlas, Morocco	Section A-B	33	43	Basbas et al., 2020	0.434211
Flinders Ranges, South Australia	Moro	52	272	Betts et al., 2014	0.160494
Fleurieu Peninsula, South Australia	Wang	29	122	Betts et al., 2018	0.192053
Fleurieu Peninsula, South Australia	SHL/FTL	147	218	Betts et al., 2018	0.40274
central Flinders Ranges, South Australia	Warragee Bore	0	150	Betts et al., 2018	0
Mt. Scott Range, South Australia	AJX-M	52	190	Betts et al., 2018	0.214876
Benagerie Ridge, South Australia	YALKALPO-2	0	34	Betts et al., 2018	0
Stuart Shelf, South Australia	SCYW-791A	65	94	Betts et al., 2018	0.408805
Burin Peninsula, Newfoundland	Duck Point	0	3	Brasier et al., 1992	0
AvalonPeninsula, Newfoundland	Long Cove	0	12	Brasier et al., 1992	0
Bonavista Peninsula, Newfoundland	Smith Sound	0	12	Brasier et al., 1992	0
Three Gorges area, South China	Luojiacun	4	11	Chang et al., 2020	0.266667
Three Gorges area, South China	Qiaojiaping	6	13	Chang et al., 2020	0.315789
Mt. Dunfee, California, USA		3	48	Corsetti and Kaufman, 1994	0.0588235
Caborca region, northwest Mexico		0	9	Barrón-Díaz et al., 2019	0
Tarim Basin, NW China	Well Ts1	600	0	Gao and Fan, 2015	1
South China	Shatan	0	8	Goldberg et al., 2007	0
Hubei, China	Yanjiahe	10	16	Guo et al., 2014	0.384615
western Flinders Ranges, South Australia	old Mern Merna	230	500	Jago et al., 2018	0.315068
Yangtze platform, South China	Meishucun	9	0	Jiang et al., 2012	1
Yangtze platform, South China	Jiuqunao	7	19	Jiang et al., 2012	0.269231
Yangtze platform, South China	Jijiapo	10	12	Jiang et al., 2012	0.454545
Yangtze platform, South China	Hezi'ao	9	7	Jiang et al., 2012	0.5625
western Anabar region, Siberia, Russia	Kotuikan River	0	102	Knoll et al., 1995	0
western Anabar region, Siberia, Russia	Dvortsy Aldan River	116	0	Knoll et al., 1995	1
Morocco	Qued Sdas	347	0	Knoll et al., 1995	1
Lesser Himalaya, India		150	0	Knoll et al., 1995	1
Elburz Mountains, Iran		19	0	Knoll et al., 1995	1
Siberian Platform， Russia	Ch-367	122	0	Kochnev et al., 2018	1
Siberian Platform， Russia	O-286-1	83	0	Kochnev et al., 2018	1
Siberian Platform， Russia	Kh-322-0	20	86	Kochnev et al., 2018	0.188679
Siberian Platform， Russia	E-343-0	0	86	Kochnev et al., 2018	0
Siberia, Russia	Bol’shaya Kuonamka	0	54	Kouchinsky et al., 2001	0
Siberia, Russia	Selinde	0	67	Kouchinsky et al., 2005	0
Anabar Uplift, Siberia, Russia	Ary-Mas-Yuryakh	0	27	Kouchinsky et al., 2017	0
southern Newfoundland	Avalonia	0	61	Landing et al., 2013	0
Yunan, China	Xiaotan	90	66	Landing et al., 2013	0.576923
Yunan, China	Laolin	90	38	Landing et al., 2013	0.703125
France	Heraultia Limestone	15	21	Landing et al., 2016	0.416667
Eastern Yukon, Canada	Mackenzie Mountains	0	22	MacNaughton et al., 2016	0
Turukhansk Uplift, Siberian Platform, Russia		348	0	Marusin et al., 2019	1
Olenek Uplift, Siberian Platform， Russia	Khastakhskaya-930	102	0	Nagovitsin et al., 2015	1
northeastern Siberian Craton, Russia	Chekurovka	0	135	Prokopiev et al., 2016	0
southwestern Mongolia	Orolgo Gorge	0	436	Pruss et al., 2019	0
southwestern Mongolia	Salaa Gorge	0	163	Pruss et al., 2019	0
southwestern Mongolia	Se Khukh-Davaa	0	78	Pruss et al., 2019	0
northwestern Siberian Platform, Russia	Sukharikha River	360	148	Rowland et al., 1998	0.708661
South Australia	Section 1	0	7	Jacquet et al., 2017	0
Chengjiang, South China	Chengjiang	11	0	Sato et al., 2014	1
Yunan, China	Lishuping	25	11	Sun et al., 2018	0.694444
SE Kazakhstan	Aktugai-I	7	0	Weber et al., 2013	1
Hubei, China	Changkan	3	0	Zhang et al., 2020	1
South Australia	Arrowie Basin	400	0	Jago et al., 2006	1
References
Barrón-Díaz, A.J., Paz-Moreno, F.A., and Hagadorn, J.W., 2019, The Cerro Rajón Formation—a new lithostratigraphic unit proposed for a Cambrian (Terreneuvian) volcano-sedimentary succession from the Caborca region, northwest Mexico: Journal of South American Earth Sciences, v. 89, p. 197–210.
El Basbas, A., Aissa, M., Ouguir, H., Mahdoudi, M.L., Madi, A., and Zouhair, M., 2020, Ouansimi copper mineralization (Western Anti-Atlas, Morocco): Paragenetic sequence and circulation of gangue hosted paleofluids.: Journal of African Earth Sciences, v. 162, p. 103692.
Betts, M.J., Paterson, J.R., Jacquet, S.M., Andrew, A.S., Hall, P.A., Jago, J.B., Jagodzinski, E.A., Preiss, W. V, Crowley, J.L., and Brougham, T., 2018, Early Cambrian chronostratigraphy and geochronology of South Australia: Earth-Science Reviews, v. 185, p. 498–543.
Betts, M.J., Topper, T.P., Valentine, J.L., Skovsted, C.B., Paterson, J.R., and Brock, G.A., 2014, A new early Cambrian bradoriid (Arthropoda) assemblage from the northern Flinders Ranges, South Australia: Gondwana Research, v. 25, p. 420–437.
Brasier, M.D., Anderson, M.M., and Corfield, R.M., 1992, Oxygen and carbon isotope stratigraphy of early Cambrian carbonates in southeastern Newfoundland and England: Geological Magazine, v. 129, p. 265–279.
Chang, S., Zhang, L., Clausen, S., and Feng, Q., 2020, Source of silica and silicification of the lowermost Cambrian Yanjiahe Formation in the Three Gorges area, South China: Palaeogeography, Palaeoclimatology, Palaeoecology, p. 109697.
Corsetti, F.A., and Kaufman, A.J., 1994, Chemostratigraphy of Neoproterozoic-Cambrian units, White-Inyo Region, eastern California and western Nevada; implications for global correlation and faunal distribution: Palaios, v. 9, p. 211–219.
Gao, Z., and Fan, T., 2015, Carbonate platform-margin architecture and its influence on Cambrian-Ordovician reef-shoal development, Tarim Basin, NW China: Marine and Petroleum Geology, v. 68, p. 291–306.
Goldberg, T., Strauss, H., Guo, Q., and Liu, C., 2007, Reconstructing marine redox conditions for the Early Cambrian Yangtze Platform: evidence from biogenic sulphur and organic carbon isotopes: Palaeogeography, Palaeoclimatology, Palaeoecology, v. 254, p. 175–193.
Gozalo, R., Álvarez, M.E.D., Vintaned, J.A.G., Zhuravlev, A.Y., Bauluz, B., Subías, I., Chirivella Martorell, J.B., Mayoral, E., Gursky, H., and Andrés, J.A., 2013, Proposal of a reference section and point for the Cambrian Series 2–3 boundary in the Mediterranean subprovince in Murero (NE Spain) and its intercontinental correlation: Geological Journal, v. 48, p. 142–155.
Guo, Q., Strauss, H., Zhao, Y., Yang, X., Peng, J., Yang, Y., and Deng, Y., 2014, Reconstructing marine redox conditions for the transition between Cambrian Series 2 and Cambrian Series 3, Kaili area, Yangtze Platform: Evidence from biogenic sulfur and degree of pyritization: Palaeogeography, Palaeoclimatology, Palaeoecology, v. 398, p. 144–153.
Jacquet, S.M., Brougham, T., Skovsted, C.B., Jago, J.B., Laurie, J.R., Betts, M.J., Topper, T.P., and Brock, G.A., 2017, Watsonella crosbyi from the lower Cambrian (Terreneuvian, stage 2) Normanville group in South Australia: Geological Magazine, v. 154, p. 1088–1104.
Jago, J.B., Zang, W.-L., Sun, X., Brock, G.A., Paterson, J.R., and Skovsted, C.B., 2006, A review of the Cambrian biostratigraphy of South Australia: Palaeoworld, v. 15, p. 406–423.
Jiang, G., Wang, X., Shi, X., Xiao, S., Zhang, S., and Dong, J., 2012, The origin of decoupled carbonate and organic carbon isotope signatures in the early Cambrian (ca. 542–520 Ma) Yangtze platform: Earth and Planetary Science Letters, v. 317, p. 96–110.
Knoll, A.H., Kaufman, A.J., Semikhatov, M.A., Grotzinger, J.P., and Adams, W., 1995, Sizing up the sub-Tommotian unconformity in Siberia: Geology, v. 23, p. 1139–1143.
Kochnev, B.B., Pokrovsky, B.G., Kuznetsov, A.B., and Marusin, V. V, 2018, C and Sr isotope chemostratigraphy of Vendian-Lower Cambrian carbonate sequences in the central Siberian Platform: Russian Geology and Geophysics, v. 59, p. 585–605.
Korovnikov, I. V, 2011, The lower boundary of the Toyonian stage (Cambrian) of the Siberian Platform: Russian Geology and Geophysics, v. 52, p. 717–724.
Kouchinsky, A., Bengtson, S., Landing, E., Steiner, M., Vendrasco, M., and Ziegler, K., 2017, Terreneuvian stratigraphy and faunas from the Anabar Uplift, Siberia:
Kouchinsky, A., Bengtson, S., Missarzhevsky, V. V, Pelechaty, S., Torssander, P., and VAL’KOV, A.K., 2001, Carbon isotope stratigraphy and the problem of a pre-Tommotian Stage in Siberia: Geological Magazine, v. 138, p. 387–396.
Kouchinsky, A., Bengtson, S., Pavlov, V., Runnegar, B., VAL’KOV, A., and Young, E., 2005, Pre-Tommotian age of the lower Pestrotsvet Formation in the Selinde section on the Siberian platform: carbon isotopic evidence: Geological Magazine, v. 142, p. 319–325.
Landing, E., Geyer, G., Maloof, A.C., Brasier, M.B., and Bowring, S.A., 2013, Proposed GSSP (Global Stratotype Section and Point) for the Lenaldanian Series and Zhurinskyan Stage (= informal Cambrian Series 2 and Stage 3; upper part of the traditional lower Cambrian): Proposal to the International Subcommission on Cambrian Stratigraphy,.
Landing, E.D., and Kouchinsky, A., 2016, Correlation of the Cambrian Evolutionary Radiation: geochronology, evolutionary stasis of earliest Cambrian (Terreneuvian) small shelly fossil (SSF) taxa, and chronostratigraphic significance: Geological Magazine, v. 153, p. 750–756.
MacNaughton, R.B., Moynihan, D.P., Roots, C.F., and Crowley, J.L., 2016, New occurrences of Oldhamia in eastern Yukon, Canada: Stratigraphic context and implications for Cambrian deep-marine biostratigraphy: Ichnos, v. 23, p. 33–52.
Marusin, V. V, Kochnev, B.B., Karlova, G.A., and Nagovitsin, K.E., 2019, Resolving Terreneuvian stratigraphy in subtidal–intertidal carbonates: palaeontological and chemostratigraphical evidence from the Turukhansk Uplift, Siberian Platform: Lethaia, v. 52, p. 464–485.
Nagovitsin, K.E., Rogov, V.I., Marusin, V. V, Karlova, G.A., Kolesnikov, A. V, Bykova, N. V, and Grazhdankin, D. V, 2015, Revised Neoproterozoic and Terreneuvian stratigraphy of the Lena-Anabar Basin and north-western slope of the Olenek Uplift, Siberian Platform: Precambrian Research, v. 270, p. 226–245.
Prokopiev, A. V, Khudoley, A.K., Koroleva, O. V, Kazakova, G.G., Lokhov, D.K., Malyshev, S. V, Zaitsev, A.I., Roev, S.P., Sergeev, S.A., and Berezhnaya, N.G., 2016, The Early Cambrian bimodal magmatism in the northeastern Siberian Craton: Russian Geology and Geophysics, v. 57, p. 155–175.
Pruss, S.B., Dwyer, C.H., Smith, E.F., Macdonald, F.A., and Tosca, N.J., 2019, Phosphatized early Cambrian archaeocyaths and small shelly fossils (SSFs) of southwestern Mongolia: Palaeogeography, Palaeoclimatology, Palaeoecology, v. 513, p. 166–177.
Rowland, S.M., Luchinina, V.A., Korovnikov, I. V, Sipin, D.P., Tarletskov, A.I., and Fedoseev, A. V, 1998, Biostratigraphy of the Vendian-Cambrian Sukharikha River section, northwestern Siberian Platform: Canadian Journal of Earth Sciences, v. 35, p. 339–352.
Sato, T., Isozaki, Y., Hitachi, T., and Shu, D., 2014, A unique condition for early diversification of small shelly fossils in the lowermost Cambrian in Chengjiang, South China: enrichment of phosphorus in restricted embayments: Gondwana Research, v. 25, p. 1139–1152.
Sun, H.-J., Zhao, Y.-L., Peng, J., and Yang, Y.-N., 2014, New Wiwaxia material from the Tsinghsutung Formation (Cambrian Series 2) of Eastern Guizhou, China: Geological Magazine, v. 151, p. 339–348.
Weber, B., Steiner, M., Evseev, S., and Yergaliev, G., 2013, First report of a Meishucun-type early Cambrian (Stage 2) ichnofauna from the Malyi Karatau area (SE Kazakhstan): palaeoichnological, palaeoecological and palaeogeographical implications: Palaeogeography, Palaeoclimatology, Palaeoecology, v. 392, p. 209–231.
Zhang, L., Chang, S., Khan, M.Z., Feng, Q., Luo, C., Steiner, M., Forel, M.-B., Liu, K., and Clausen, S., 2020, Influence of palaeo-redox and diagenetic conditions on the spatial distribution of Cambrian biotas: A case study from the upper Shuijingtuo Formation (Cambrian Series 2, Stage 3), Three Gorges area of South China: Palaeogeography, Palaeoclimatology, Palaeoecology, p. 109696.

## Sheet: Series2
Region	Section	dolostone (meter)	limestone (meter)	Reference	Dolomite abundance
Flinders Ranges, South Australia	Moro	0	200	Betts et al., 2014	0
Montagne Noire, France	Minervois Nappe	149	315	Devaere et al., 2013	0.321121
Montagne Noire, France	Melagues	868	0	Devaere et al., 2013	1
South China	Shatan	0	27	Goldberg et al., 2007	0
Shandong, China		52	15	Lee et al., 2014	0.776119
Eastern Yukon, Canada	Mackenzie Mountains	0	588	MacNaughton et al., 2016	0
southern Great Basin, USA	0	0	4	Mata and Bottjer, 2013	0
northwestern Siberian Platform, Russia	Sukharikha River	0	20	Rowland et al., 1998	0
Hubei, China	Changkan	0	8	Zhang et al., 2020	0
Hunan, South China	Yutang	0	138	Adachi et al., 2014	0
Nevada, USA	Montezuma Peak	0	83	Ahn and Babcock, 2012	0
Seberia, Russia	AchchagyTuoydach	1	110	Brasier et al., 1994	0.00900901
Seberia, Russia	Labaya	36	100	Brasier et al., 1994	0.264706
Seberia, Russia	Titary	96	107	Brasier et al., 1994	0.472906
Hubei Province, South China	Wangzishi	3	20	Broce et al., 2014	0.130435
Flinder ranges, South Australia	Brachina Gorge	0	66	Brock and Cooper, 1993	0
Flinder ranges, South Australia	Ten Mile Creek	0	40	Brock and Cooper, 1993	0
Scandinavia	Mt Assjatj	0	2	Cederstrom et al., 2012	0
Scandinavia	Gislovshammar	0	0.5	Cederstrom et al., 2012	0
East Antarctica	Holyoake Range	0	325	Claybourn, 2017	0
Bennett Island, Russia	Kharaulakh Mountains	0	40	Danukalova et al., 2014	0
northern Montagne Noire, southern France		840	0	Devaere et al., 2014	1
Northwest Territories, Canada	Section 3	14	518	Dilliard et al., 2007	0.0263158
Northwest Territories, Canada	Section 10	18	440	Dilliard et al., 2007	0.0393013
Saxony, Germany	Kunnersdorf	0	25	Elicki and Schneider, 1992	0
Great Basin, western USA	Emigrant Pass	0	33	Faggetter et al., 2017	0
Great Basin, western USA	Oak Springs Summit	0	8	Faggetter et al., 2017	0
Great Basin, western USA	Ruin Wash	0	13	Faggetter et al., 2017	0
north Greenland, Canada	Locality 1	24	13	Geyer and Peel, 2011	0.648649
north Greenland, Canada	Locality 3-4	7	20	Geyer and Peel, 2011	0.259259
north Greenland, Canada	Locality 6	8	5	Geyer and Peel, 2011	0.615385
Murero, NE Spain	Cadenas Ibéricas	18	0	Gozalo et al., 2013	1
Yangtze Platform, China	Wuliu-Zengjiayan	25	32	Guo et al., 2014	0.438596
Yangtze Platform, China	Jianshan	21	20	Guo et al., 2014	0.512195
Three Gorges, China	Drill Site 5	0	39	Ishikawa et al., 2014	0
Three Gorges, China	Drill Site 6	0	61	Ishikawa et al., 2014	0
South Australia	Arrowie Basin	0	800	Jago et al., 2006	0
Mackenzie Mountains, northwestern Canada	Ravens Throat river	27	0	Kimmig and Pratt, 2015	1
Siberian Platform, Russia	Lena R.	109	264	Korovnikov, 2011	0.292225
Siberian Platform, Russia	Olenek uplift	0	214	Korovnikov, 2011	0
Siberian Platform, Russia	Nekekit R.	0	166	Korovnikov, 2011	0
Siberian Platform, Russia	Western Anabar	123	73	Korovnikov, 2011	0.627551
Siberian Platform, Russia	Sukharikha R.	0	333	Korovnikov, 2011	0
southern Siberia, Russia	Ak-Kaya	0	257	Korovnikov, 2013	0
Xian, North China	Longxian	3	6	Li et al., 2018	0.333333
Cantabrian Mts., northern Spain	Salce	29	11	Perejon et al., 2012	0.725
Cantabrian Mts., northern Spain	Barrios de Luna	15	40	Perejon et al., 2012	0.272727
Gorny Altai, southern Siberia, Russia		0	2909	Pouille et al., 2011	0
Labrador, Canada		7	30	Pruss et al., 2012	0.189189
Sichuan Basin, China	Taiyuan	38	47	Ren et al., 2017a	0.447059
Chongqing, South China	Bandenggou	30	61	Ren et al., 2017b	0.32967
NE Greenland, Canada	Albert Heim Bjerge	0	93	Skovsted and Holmer, 2005	0
NE Greenland, Canada	C.H. Ostenfeld Nunatak	0	141	Skovsted and Holmer, 2005	0
Northern Territory, Australia	Hermannsburg 41 corehole	0	23	Smith et al., 2015	0
Eastern Guizhou, China	Songshan	21	200	Sun et al., 2014	0.0950226
Flinders Ranges, South Australia	MMF	0	16	Topper et al., 2009	0
Mount Scott Range, South Australia	AJX-M	50	215	Topper et al., 2011	0.188679
Elder Range, South Australia	ER-9	0	148	Topper et al., 2011	0
Guizhou, China	Miaobanpo	21	6	Wen et al., 2015	0.777778
Arizona, USA	Ulakhan-Kyyry-Taas	0	21	Wotte et al., 2011	0
North China	Chaijiawa	29	54	Yun et al., 2016	0.349398
North China	Shuiyancun	20	57	Yun et al., 2016	0.25974
North China	Wuhai	0	33	Zhang et al., 2015	0
References
Adachi, N., Ezaki, Y., and Liu, J., 2014, The late early Cambrian microbial reefs immediately after the demise of archaeocyathan reefs, Hunan Province, South China: Palaeogeography, Palaeoclimatology, Palaeoecology, v. 407, p. 45–55.
Ahn, S.Y., and Babcock, L.E., 2012, Microorganism-mediated preservation of Planolites, a common trace fossil from the Harkless Formation, Cambrian of Nevada, USA: Sedimentary Geology, v. 263, p. 30–35.
El Basbas, A., Aissa, M., Ouguir, H., Mahdoudi, M.L., Madi, A., and Zouhair, M., 2020, Ouansimi copper mineralization (Western Anti-Atlas, Morocco): Paragenetic sequence and circulation of gangue hosted paleofluids.: Journal of African Earth Sciences, v. 162, p. 103692.
Betts, M.J., Topper, T.P., Valentine, J.L., Skovsted, C.B., Paterson, J.R., and Brock, G.A., 2014, A new early Cambrian bradoriid (Arthropoda) assemblage from the northern Flinders Ranges, South Australia: Gondwana Research, v. 25, p. 420–437.
Brasier, M.D., Rozanov, A.Y., Zhuravlev, A.Y., Corfield, R.M., and Derry, L.A., 1994, A carbon isotope reference scale for the Lower Cambrian succession in Siberia: report of IGCP Project 303: Geological Magazine, v. 131, p. 767–783.
Broce, J., Schiffbauer, J.D., Sharma, K. Sen, Wang, G., and Xiao, S., 2014, Possible Animal Embryos from the Lower Cambrian (Stage 3) Shuijingtuo Formation, Hubei Province, South ChinaEarly Cambrian Animal Embryos: Journal of Paleontology, v. 88, p. 385–394.
Brock, G.A., and Cooper, B.J., 1993, Shelly fossils from the Early Cambrian (Toyonian) Wirrealpa, Aroona Creek, and Ramsay Limestones of South Australia: Journal of Paleontology, p. 758–787.
Cederstroem, P., Ahlberg, P., Babcock, L.E., Ahlgren, J., Høyberget, M., and Nilsson, C.H., 2012, Morphology, ontogeny and distribution of the Cambrian Series 2 ellipsocephalid trilobite Strenuaeva spinosa from Scandinavia: GFF, v. 134, p. 157–171.
Claybourn, T., 2017, Cambrian Series 2 (Stages 3-4) Small Shelly Fossils from East Antarctica:
Danukalova, M.K., Kuzmichev, A.B., and Korovnikov, I. V, 2014, The Cambrian of Bennett Island (New Siberian Islands): Stratigraphy and Geological Correlation, v. 22, p. 347–369.
Dilliard, K.A., Pope, M.C., Coniglio, M., Hasiotis, S.T., and Lieberman, B.S., 2007, Stable isotope geochemistry of the lower Cambrian Sekwi Formation, Northwest Territories, Canada: Implications for ocean chemistry and secular curve generation: Palaeogeography, Palaeoclimatology, Palaeoecology, v. 256, p. 174–194.
Elicki, O., and Schneider, J., 1992, Lower Cambrian (Atdabanian/Botomian) shallow-marine carbonates of the Görlitz Synclinorium (Saxony/Germany): Facies, v. 26, p. 55–66.
Faggetter, L.E., Wignall, P.B., Pruss, S.B., Newton, R.J., Sun, Y., and Crowley, S.F., 2017, Trilobite extinctions, facies changes and the ROECE carbon isotope excursion at the Cambrian Series 2–3 boundary, Great Basin, western USA: Palaeogeography, Palaeoclimatology, Palaeoecology, v. 478, p. 53–66.
Geyer, G., and Peel, J.S., 2011, The Henson Gletscher Formation, North Greenland, and its bearing on the global Cambrian Series 2–Series 3 boundary: Bulletin of Geosciences, v. 86, p. 465–534.
Gozalo, R., Álvarez, M.E.D., Vintaned, J.A.G., Zhuravlev, A.Y., Bauluz, B., Subías, I., Chirivella Martorell, J.B., Mayoral, E., Gursky, H., and Andrés, J.A., 2013, Proposal of a reference section and point for the Cambrian Series 2–3 boundary in the Mediterranean subprovince in Murero (NE Spain) and its intercontinental correlation: Geological Journal, v. 48, p. 142–155.
Guo, Q., Strauss, H., Zhao, Y., Yang, X., Peng, J., Yang, Y., and Deng, Y., 2014, Reconstructing marine redox conditions for the transition between Cambrian Series 2 and Cambrian Series 3, Kaili area, Yangtze Platform: Evidence from biogenic sulfur and degree of pyritization: Palaeogeography, Palaeoclimatology, Palaeoecology, v. 398, p. 144–153.
Ishikawa, T., Ueno, Y., Shu, D., Li, Y., Han, J., Guo, J., Yoshida, N., Maruyama, S., and Komiya, T., 2014, The δ13C excursions spanning the Cambrian explosion to the Canglangpuian mass extinction in the Three Gorges area, South China: Gondwana Research, v. 25, p. 1045–1056.
Jago, J.B., Zang, W.-L., Sun, X., Brock, G.A., Paterson, J.R., and Skovsted, C.B., 2006, A review of the Cambrian biostratigraphy of South Australia: Palaeoworld, v. 15, p. 406–423.
Kimmig, J., and Pratt, B.R., 2015, Soft-bodied biota from the middle Cambrian (Drumian) Rockslide Formation, Mackenzie Mountains, northwestern Canada: Journal of Paleontology, v. 89, p. 51–71.
Knoll, A.H., Kaufman, A.J., Semikhatov, M.A., Grotzinger, J.P., and Adams, W., 1995, Sizing up the sub-Tommotian unconformity in Siberia: Geology, v. 23, p. 1139–1143.
Korovnikov, I. V, 2011, The lower boundary of the Toyonian stage (Cambrian) of the Siberian Platform: Russian Geology and Geophysics, v. 52, p. 717–724.
Li, L., Yun, H., and Zhang, X., 2018, Precambrian-Cambrian transition in the southern margin of North China:
Perejón, A., Moreno-Eiris, E., Bechstädt, T., Menéndez, S., and Rodríguez-Martínez, M., 2012, New Bilbilian (early Cambrian) archaeocyath-rich thrombolitic microbialite from the Lancara Formation (Cantabrian Mts., northern Spain)/Nuevas microbialitas de arqueociatos y trombolitos del Bilbiliense (Cambrico inferior) de la Formacion Lancara (Cordillera Cantabrica, norte de España): Journal of Iberi…
Pouille, L., Obut, O., Danelian, T., and Sennikov, N., 2011, Lower Cambrian (Botomian) polycystine Radiolaria from the Altai Mountains (southern Siberia, Russia): Comptes Rendus Palevol, v. 10, p. 627–633.
Pruss, S.B., Clemente, H., and Laflamme, M., 2012, Early (Series 2) Cambrian archaeocyathan reefs of southern Labrador as a locus for skeletal carbonate production: Lethaia, v. 45, p. 401–410.
Ren, Y., Zhong, D., Gao, C., Liang, T., Sun, H., Wu, D., and Zheng, X., 2017a, High-resolution carbon isotope records and correlations of the lower Cambrian Longwangmiao formation (stage 4, Toyonian) in Chongqing, South China: Palaeogeography, Palaeoclimatology, Palaeoecology, v. 485, p. 572–592.
Ren, Y., Zhong, D., Gao, C., Sun, H., Peng, H., Zheng, X., and Qiu, C., 2017b, Origin of dolomite of the lower Cambrian Longwangmiao Formation, eastern Sichuan Basin, China: Carbonates and Evaporites, p. 1–20.
Skovsted, C.B., and Holmer, L.E., 2005, Early Cambrian brachiopods from north‐east Greenland: Palaeontology, v. 48, p. 325–345.
Smith, P.M., Brock, G.A., and Paterson, J.R., 2015, Fauna and biostratigraphy of the Cambrian (Series 2, Stage 4; Ordian) Tempe Formation (Pertaoorrta Group), Amadeus Basin, Northern Territory: Alcheringa: An Australasian Journal of Palaeontology, v. 39, p. 40–70.
Sun, H.-J., Zhao, Y.-L., Peng, J., and Yang, Y.-N., 2014, New Wiwaxia material from the Tsinghsutung Formation (Cambrian Series 2) of Eastern Guizhou, China: Geological Magazine, v. 151, p. 339–348.
Topper, T.P., Brock, G.A., Skovsted, C.B., and Paterson, J.R., 2009, Shelly Fossils from the Lower Cambrian’Pararaia bunyerooensis’ Zone, Flinders Ranges, South Australia: Memoirs of the Association of Australasian Palaeontologists, p. 199.
Topper, T.P., Skovsted, C.B., Brock, G.A., and Paterson, J.R., 2011, The oldest bivalved arthropods from the early Cambrian of East Gondwana: systematics, biostratigraphy and biogeography: Gondwana Research, v. 19, p. 310–326.
Wen, R.-Q., Zhao, Y.-L., and Peng, J., 2015, Morphology and ontogeny of Tuzoia bispinosa from the Kaili Biota (Cambrian Stage 5) of eastern Guizhou, China: Palaeoworld, v. 24, p. 61–70.
Wotte, T., Strauss, H., and Sundberg, F.A., 2011, Carbon and sulfur isotopes from the Cambrian Series 2–Cambrian Series 3 of Laurentia and Siberia: Museum of Northern Arizona Bulletin, v. 67, p. 43–63.
Yun, H., Zhang, X., Li, L., Zhang, M., and Liu, W., 2016, Skeletal fossils and microfacies analysis of the lowermost Cambrian in the southwestern margin of the North China Platform: Journal of Asian Earth Sciences, v. 129, p. 54–66.
Zhang, Z., Zhang, Z., Holmer, L.E., and Li, G., 2015, First report of linguloid brachiopods with soft parts from the lower Cambrian (Series 2, Stage 4) of the Three Gorges area, South China, in Annales de Paléontologie, Elsevier, v. 101, p. 167–177.

## Sheet: Series3
Region	Section	dolostone (meter)	limestone (meter)	Reference	Dolomite abundance
Montagne Noire, France	Minervois Nappe	0	96	Devaere et al., 2013	0
Shandong, China		0	178	Lee et al., 2014	0
northwestern Scotland	Loch Eriboll	43	0	Faggetter et al., 2016	1
northwestern Scotland	Ardvreck Castle	6	0	Faggetter et al., 2016	1
north Greenland, Canada	Locality 3-4	0	25	Geyer and Peel, 2011	0
north Greenland, Canada	Locality 6	8	1	Geyer and Peel, 2011	0.888889
Murero, NE Spain	Cadenas Ibéricas	18	0	Gozalo et al., 2013	1
Great Basin, western USA	House Range	0	40	Howley and Jiang, 2010	0
Great Basin, western USA	Wah Wah Mountains	7	108	Howley and Jiang, 2010	0.0608696
Mackenzie Mountains, northwestern Canada	Ravens Throat river	27	104	Kimmig and Pratt, 2015	0.206107
Falbygden, Västergötland, Sweden	Tomten-1 core	0	1	Lundberg, 2016	0
Inner Mongolia, North China	Wuhai	8	115	Zhang et al., 2015	0.0650407
Scania, Sweden	Andrarum-3 drill core	0	1.5	Ahlberg et al., 2009	0
Öland, Sweden	Grönhögen-2015 drill core	0	1	Ahlberg et al., 2019	0
Öland, Sweden	Grönhögen-2015 drill core	0	3	Ahlberg et al., 2019	0
Kerman Province, Iran	Dahu	8	29	Ameri, 2015	0.216216
Sonora, Mexico		0	703	Beresi et al., 2017	0
Gangweon Province, Korea	Eodungol	1	73	Chung et al., 2011	0.0135135
Gangweon Province, Korea	Gonggiri	2	56	Chung et al., 2011	0.0344828
ordan Rift Valley, Middle East	Dead Sea	24	51	Elicki, 2012	0.32
Patuxent Range, Antarctica	Postel Nunatak	0	390	Evans et al., 2018	0
Shandong, China	Jiulongshan	0	66	Ezaki et al., 2017	0
Hunan Province, China	Luoyixi	0	87	Fang et al., 2020	0
northern Iran	Shahmirzad	106	86	Hamdi et al., 1995	0.552083
Alborz, MountainsIran	Mila-Kuh hill	0	240	Holmer et al., 2019	0
Yeongwol, Korea	Deoksang A	0	5	홍발, 2014	0
Yeongwol, Korea	Deoksang A	0	3	홍발, 2014	0
Nevada and Utah, USA	Drum Mountains	204	728	Howley, 2010	0.218884
Nevada and Utah, USA	Panaca Hills	161	976	Howley, 2010	0.141601
Nevada and Utah, USA	Desert Range	0	842	Howley, 2010	0
northern Siberia, Russia	Bol'shaya Kuonamka R.	0	12	Kouchinsky et al., 2011	0
northern Siberia, Russia	Malaya Kuonamka R.	0	18	Kouchinsky et al., 2011	0
South China	Wangcun	30	220	Li et al., 2020	0.12
Taebaeksan Basin, Korea		0	5	Lim et al., 2015	0
Iberian Chains, NE Spain	Jarque 1	20	0	Martorell et al., 2017	1
Western Canada	Castle Mountain	10	37	Morgan et al., 2019	0.212766
Cantabrian Zone, northern Spain	Porma	0	7	Palacios, 2015	0
Cantabrian Zone, northern Spain	Oville	0	15	Palacios, 2015	0
Cantabrian Zone, northern Spain	Barrios de Luna A	0	20	Palacios, 2015	0
San Juan, Argentina		0	575	Pratt et al., 2012	0
Shanxi Province, China	Kelan	0	166	Riaz et al., 2019	0
central Missouri Basin, USA	TE-1	0	22	Schiffbauer et al., 2017	0
central Missouri Basin, USA	HM-1	10	47	Schiffbauer et al., 2017	0.175439
central Missouri Basin, USA	12EE	60	0	Schiffbauer et al., 2017	1
Amadeus Basin, central Australia	RRG	33	57	Smith et al., 2014	0.366667
Nevada, USA	Split Mountain West	0	47	Sundberg, 2018	0
Nevada, USA	Split Mountain East	0	27	Sundberg, 2018	0
Nevada, USA	Trench	0	4	Sundberg, 2018	0
South China	Wuliu-Zengjiayan	7	20	Yang et al., 2015	0.259259
South China	Maobanpo	7	14	Yang et al., 2015	0.333333
North China	Tangwangzhai	0	46	Bagnoli et al., 2014	0
Malyi Karatau, southern Kazakhstan	Kyrshabakty	0	85	Ergaliev et al., 2008	0
Datong, North China	Kouquan	0	4	Latif et al., 2019	0
South China	Duibian A	0	50	Li et al., 2018	0
Hebei Province, China	Shuangqiao	0	2	Ng et al., 2015	0
References
Ahlberg, P.E.R., Axheimer, N., Babcock, L.E., Eriksson, M.E., Schmitz, B., and Terfelt, F., 2009, Cambrian high‐resolution biostratigraphy and carbon isotope chemostratigraphy in Scania, Sweden: first record of the SPICE and DICE excursions in Scandinavia: Lethaia, v. 42, p. 2–16.
Ahlberg, P., Lundberg, F., Erlström, M., Calner, M., Lindskog, A., Dahlqvist, P., and Joachimski, M.M., 2019, Integrated Cambrian biostratigraphy and carbon isotope chemostratigraphy of the Grönhögen-2015 drill core, Öland, Sweden: Geological Magazine, v. 156, p. 935–949.
Ameri, H., 2015, Peri-Gondwana late early–middle Cambrian trilobites from the Kuhbanan formation in dahu section, Kerman Province, Iran: Arabian Journal of Geosciences, v. 8, p. 1467–1478.
Bagnoli, G., Qi, Y.P., Zuo, J.X., Du, S.X., Liu, S.C., and Zhang, Z.Q., 2014, Integrated biostratigraphy and carbon isotopes from the Cambrian Tangwangzhai section, North China: Palaeoworld, v. 23, p. 112–124, doi:10.1016/j.palwor.2013.12.002.
Beresi, M.S., Botting, J., Palafox, J.J., and Buitron Sanchez, B.E., 2017, New reticulosan sponges from the middle Cambrian of Sonora, Mexico:
Chen, Z.Q. et al., 2015, Complete biotic and sedimentary records of the Permian-Triassic transition from Meishan section, South China: Ecologically assessing mass extinction and its aftermath: Earth-Science Reviews, v. 149, p. 67–107, doi:10.1016/j.earscirev.2014.10.005.
Chung, G.-S., Lee, J.-G., and Lee, K.-S., 2011, Stable Carbon Isotope Stratigraphy of the Cambrian Machari Formation in the Yeongweol Area, Gangweon Province, Korea: 한국지구과학회지, v. 32, p. 437–452.
Devaere, L., Clausen, S., Steiner, M., Álvaro, J.J., and Vachard, D., 2013, Chronostratigraphic and palaeogeographic significance of an early Cambrian microfauna from the Heraultia Limestone, northern Montagne Noire, France: Palaeontologia Electronica, v. 16, p. 17A – 91.
Elicki, O., 2012, First skeletal microfauna from the Cambrian Series 3 of the Jordan Rift Valley (Middle East): Memoirs of the Association of Australasian Palaeontologists, p. 153.
Ergaliev, G., Zhemchuznikov, V., Ergaliev, F., Popov, L., Pour, M., and Bassett, M., 2008, Trilobite biostratigraphy and biodiversity patterns through the Middle-Upper Cambrian transition in the Kyrshabakty Section, Malyi Karatau, Southern Kazakhstan: Advances in trilobite research, p. 91–98.
Evans, K.R., McKenna, L.W., Lieberman, B.S., Weichert, W.D., and Macleod, K.G., 2018, Geology of the Nelson Limestone, Postel Nunatak, Patuxent Range, Antarctica: Antarctic Science, v. 30, p. 29–43.
Ezaki, Y., Liu, J., Adachi, N., and Yan, Z., 2017, MICROBIALITE DEVELOPMENT DURING THE PROTRACTED INHIBITION OF SKELETAL-DOMINATED REEFS IN THE ZHANGXIA FORMATION (CAMBRIAN SERIES 3) IN SHANDONG PROVINCE, NORTH CHINADRUMIAN SPONGE-MICROBIAL REEFSY. EZAKI ET AL.: Palaios, v. 32, p. 559–571.
Faggetter, L.E., Wignall, P.B., Pruss, S.B., Sun, Y., Raine, R.J., Newton, R.J., Widdowson, M., Joachimski, M.M., and Smith, P.M., 2018, Sequence stratigraphy, chemostratigraphy and facies analysis of Cambrian Series 2–Series 3 boundary strata in northwestern Scotland: Geological magazine, v. 155, p. 865–877.
Fang, J., Wu, H., Fang, Q., Shi, M., Zhang, S., Yang, T., Li, H., and Cao, L., 2020, Cyclostratigraphy of the global stratotype section and point (GSSP) of the basal Guzhangian Stage of the Cambrian Period: Palaeogeography, Palaeoclimatology, Palaeoecology, v. 540, p. 109530.
Geyer, G., and Peel, J.S., 2011, The Henson Gletscher Formation, North Greenland, and its bearing on the global Cambrian Series 2–Series 3 boundary: Bulletin of Geosciences, v. 86, p. 465–534.
Gozalo, R., Álvarez, M.E.D., Vintaned, J.A.G., Zhuravlev, A.Y., Bauluz, B., Subías, I., Chirivella Martorell, J.B., Mayoral, E., Gursky, H., and Andrés, J.A., 2013, Proposal of a reference section and point for the Cambrian Series 2–3 boundary in the Mediterranean subprovince in Murero (NE Spain) and its intercontinental correlation: Geological Journal, v. 48, p. 142–155.
Hamdi, B., Rozanov, A.Y., and Zhuravle, A.Y., 1995, Latest Middle Cambrian metazoan reef from northern Iran: Geological Magazine, v. 132, p. 367–373.
Holmer, L.E., Kebria‐ee Zadeh, M., Popov, L.E., Ghobadi Pour, M., Álvaro, J.J., Hairapetian, V., and Zhang, Z., 2019, Cambrian rhynchonelliform nisusioid brachiopods: phylogeny and distribution: Papers in Palaeontology, v. 5, p. 559–575.
Howley, R.A., 2010, Sequence and chemostratigraphy of the Middle Cambrian succession in Nevada and Utah:
Kimmig, J., and Pratt, B.R., 2015, Soft-bodied biota from the middle Cambrian (Drumian) Rockslide Formation, Mackenzie Mountains, northwestern Canada: Journal of Paleontology, v. 89, p. 51–71.
Kouchinsky, A., Bengtson, S., Clausen, S., Gubanov, A., Malinky, J.M., and Peel, J.S., 2011, A Middle Cambrian fauna of skeletal fossils from the Kuonamka Formation, northern Siberia: Alcheringa, v. 35, p. 123–189.
Latif, K., Xiao, E., Riaz, M., and Hussein, A.A.A., 2019, Calcified cyanobacteria fossils from the leiolitic bioherm in the Furongian Changshan Formation, Datong (North China Platform): Carbonates and Evaporites, v. 34, p. 825–843, doi:10.1007/s13146-018-0472-8.
Lee, J.-H., Chen, J., Choh, S.-J., Lee, D.-J., Han, Z., and Chough, S.K., 2014, FURONGIAN (LATE CAMBRIAN) SPONGE–MICROBIAL MAZE-LIKE REEFS IN THE NORTH CHINA PLATFORMFURONGIAN SPONGE–MICROBIAL REEFS: Palaios, v. 29, p. 27–37.
Li, L., Yun, H., and Zhang, X., 2018, Precambrian-Cambrian transition in the southern margin of North China:
Li, D., Zhang, X., Zhang, X., Zhu, H., Peng, S., Sun, L., and Shen, Y., 2020, A paired carbonate–organic δ13C approach to understanding the Cambrian Drumian carbon isotope excursion (DICE): Precambrian Research, v. 349, p. 105503.
Lim, J.N., Chung, G.S., Park, T.-Y.S., and Lee, K.S., 2015, Lithofacies and stable carbon isotope stratigraphy of the Cambrian Sesong Formation in the Taebaeksan Basin, Korea: Journal of the Korean earth science society, v. 36, p. 617–631.
Lundberg, F., 2016, Cambrian stratigraphy and depositional dynamics based on the Tomten-1 drill core, Falbygden, Västergötland, Sweden: Dissertations in Geology at Lund University,.
Martorell, J.B.C., Liñán, E., Álvarez, M.E.D., and Gozalo, R., 2017, Bailiaspis (Trilobita) with English affinities from the Mansilla Formation (Cambrian Series 3 of the Iberian Chains; NE Spain): Spanish Journal of Palaeontology, v. 32, p. 17–26.
Morgan, C.A., Henderson, C.M., and Pratt, B.R., 2019, A Giant Protopaleodictyon from the Middle Cambrian of Western Canada: Ichnos, v. 26, p. 216–223.
Ng, T.W., Botting, J.P., Yuan, J.L., and Lin, J.P., 2015, New discoveries of Cambrian pelmatozoan echinoderm ossicles from North China: Palaeoworld, v. 24, p. 438–444, doi:10.1016/j.palwor.2015.05.008.
Palacios, T., 2015, Acritarch assemblages from the Oville and Barrios Formations, northern Spain: A pilot proposal of a middle Cambrian (Series 3) acritarch biozonation in northwestern Gondwana: Review of Palaeobotany and Palynology, v. 219, p. 71–105.
Pratt, B.R., Raviolo, M.M., and Bordonaro, O.L., 2012, Carbonate platform dominated by peloidal sands: lower Ordovician La Silla Formation of the eastern Precordillera, San Juan, Argentina: Sedimentology, v. 59, p. 843–866.
Riaz, M., Xiao, E., Latif, K., and Zafar, T., 2019, Sequence-stratigraphic position of oolitic bank of Cambrian in North China platform: example from the Kelan section of Shanxi Province: Arabian Journal for Science and Engineering, v. 44, p. 391–407.
Schiffbauer, J.D., Huntley, J.W., Fike, D.A., Jeffrey, M.J., Gregg, J.M., and Shelton, K.L., 2017, Decoupling biogeochemical records, extinction, and environmental change during the Cambrian SPICE event: Science advances, v. 3, p. e1602158.
Smith, P.M., Brock, G.A., Paterson, J.R., and Topper, T.P., 2014, New bradoriid arthropods from the giles creek dolostone (cambrian series 3, stage 5; templetonian), amadeus basin, central Australia: Memoirs of the Association of Australasian Palaeontologists, p. 233.
Sundberg, F.A., 2018, Trilobite biostratigraphy of the Cambrian 5 and Drumian stages, Series 3 (Laurentian Delamaran, Topazan, and Marjuman stages, Lincolnian Series) of the lower Emigrant Formation at Clayton Ridge, Esmeralda County, Nevada: Journal of Paleontology, v. 92, p. 1–44.
Zhang, Z., Zhang, Z., Holmer, L.E., and Li, G., 2015, First report of linguloid brachiopods with soft parts from the lower Cambrian (Series 2, Stage 4) of the Three Gorges area, South China, in Annales de Paléontologie, Elsevier, v. 101, p. 167–177.
홍발, 2014, Cambrian Series 3 trilobites from the lower part of the Machari Formation, Deoksang section, Yeongwol, Korea:

## Sheet: Furongian
Region	Section	dolostone (meter)	limestone (meter)	Reference	Dolomite abundance
Shandong, China		0	100	Lee et al., 2014	0
Falbygden, Västergötland, Sweden	Tomten-1 core	0	4	Lundberg, 2016	0
Kerman Province, Iran	Dahu	33	4	Ameri, 2013	0.891892
Sonora, Mexico		0	192	Beresi et al., 2017	0
Northern Victoria Land, Antarctica	Reilly Ridge	0	14	Jago et al., 2020	0
Northern Victoria Land, Antarctica	Helix Pass	0	10	Jago et al., 2020	0
Taebaeksan Basin, Korea		0	3	Lim et al., 2015	0
San Juan, Argentina		424	404	Pratt et al., 2012	0.512077
Shanxi Province, China	Kelan	26	100	Riaz et al., 2019	0.206349
central Missouri Basin, USA	TE-1	0	22	Schiffbauer et al., 2017	0
central Missouri Basin, USA	HM-1	0	22	Schiffbauer et al., 2017	0
central Missouri Basin, USA	12EE	20	0	Schiffbauer et al., 2017	1
western Mediterranean region，Spain	Salleles-Cabardes	0	28	Alvaro et al., 2007	0
western Newfoundland, Canada	Martin Point	0	68	Azmy, 2019	0
North China	Tangwangzhai	0	68	Bagnoli et al., 2014	0
southern Öland, Sweden	Degerhamn quarry road	0	1.5	Bagnoli and Stouge, 2014	0
Arabian Peninsula, Oman		17	40	Bagnoli et al., 2016	0.298246
western Newfoundland, Canada	March Point	60	125	Barili et al., 2018	0.324324
western Newfoundland, Canada	Felix Cove	14	14	Barili et al., 2018	0.5
western Utah, USA		100	0	Coulson, 2016	1
Malyi Karatau, southern Kazakhstan	Kyrshabakty	0	279	Ergaliev et al., 2008	0
Sichuan Basin, China		515	0	Hou et al., 2016	1
Eastern Alborz, north-central Iran	Mila-Kuh	0	20	Jahangir et al., 2015	0
Eastern Alborz, north-central Iran	Simeh-Kuh	0	17	Jahangir et al., 2015	0
Eastern Alborz, north-central Iran	Deh-Molla	0	5	Jahangir et al., 2015a	0
Kopet-Dagh, Iran	Kalat Valley	0	69	Jahangir et al., 2015b	0
Datong, North China	Kouquan	0	18	Latif et al., 2019	0
Western Yakutia, Russia	Khos-Nelege	0	240	Lazarenko et al., 2011	0
Nevada, USA	Arrow Canyon Range	37	76	Lee et al., 2019	0.327434
South China	Wa'ergang	0	176	Li et al., 2018	0
South China	Duibian B	0	55	Li et al., 2018	0
South China	Duibian A	0	141	Li et al., 2018	0
North China	Jinzhouwan	0	64	Mei et al., 2020	0
Hebei Province, China	Shuangqiao	0	1	Ng et al., 2015	0
northern Siberian Platform, Russia	Kotuy River	0	340	Pegel, 2014	0
Hunan Province, South China	Paibi	0	8	Peng et al., 2014	0
Derenjal Mountains, Iran	Section A	0	55	Popov et al., 2009	0
Newfoundland, Canada	Port au Port Peninsula	163	220	Pruss and Knoll, 2017	0.425587
Hunneberg, Sweden	Nygard	0	1.5	Rasmussen et al., 2016	0
central Sweden	Hällekis-1 well	0	7	Sanei et al., 2014	0
Skien–Langesund, southern Norway	Porsgrunn core	0	6	Schovsbo et al., 2018	0
Skien–Langesund, southern Sweden	Gislövshammar-2	0	8	Schovsbo et al., 2018	0
Skien–Langesund, Denmark	Billegrav-2 cores	0	2	Schovsbo et al., 2018	0
western Newfoundland, Canada	Isthmus Bay	117	8	Scorrer et al., 2019	0.936
Neveda, USA	Goldfield Hills	0	160	Sundberg et al., 2007	0
Newfoundland, Canada	Green Point	0	3	Wang et al., 2019	0
South China	Xiaoyangqiao	0	11	Wang et al., 2019	0
Henan Province, China		234	0	Zhang et al., 2017	1
Argentine Precordillera， Argentina	Quebrada de Angostura	0	450	Sial et al., 2008	0
Argentine Precordillera, Argentina	Quebrada de La Flecha	82	497	Sial et al., 2008	0.141623
Argentine Precordillera, Argentina	Cerro La Silla	350	650	Sial et al., 2008	0.35
References
Álvaro, J.J., Ferretti, A., González-Gómez, C., Serpagli, E., Tortello, M.F., Vecoli, M., and Vizcaïno, D., 2007, A review of the Late Cambrian (Furongian) palaeogeography in the western Mediterranean region, NW Gondwana: Earth-Science Reviews, v. 85, p. 47–81, doi:10.1016/j.earscirev.2007.06.006.
Ameri, H., 2015, Peri-Gondwana late early–middle Cambrian trilobites from the Kuhbanan formation in dahu section, Kerman Province, Iran: Arabian Journal of Geosciences, v. 8, p. 1467–1478.
Azmy, K., 2019, Carbon-isotope stratigraphy of the SPICE event (Upper Cambrian) in eastern Laurentia: Implications for global correlation and a potential reference section: Geological Magazine, v. 156, p. 1311–1322, doi:10.1017/S0016756818000638.
Bagnoli, G., Machado, G., and Salmeen, M., 2016, The first record of Cambrian conodonts from the Huqf-Haushi outcrops, Oman, Arabian Peninsula.:
Bagnoli, G., Qi, Y.P., Zuo, J.X., Du, S.X., Liu, S.C., and Zhang, Z.Q., 2014, Integrated biostratigraphy and carbon isotopes from the Cambrian Tangwangzhai section, North China: Palaeoworld, v. 23, p. 112–124, doi:10.1016/j.palwor.2013.12.002.
Bagnoli, G., and Stouge, S., 2014, Upper Furongian (Cambrian) conodonts from the Degerhamn quarry road section, southern Öland, Sweden: Gff, v. 136, p. 436–458, doi:10.1080/11035897.2013.858768.
Barili, R., Neilson, J.E., Brasier, A.T., Goldberg, K., Bardola, T.P., De Ros, L.F., and Leng, M., 2018, Carbon isotopes, stratigraphy, and environmental change: The middle–Upper Cambrian positive excursion (SPICE) in port au Port Group, Western Newfoundland, Canada: Canadian Journal of Earth Sciences, v. 55, p. 1209–1222, doi:10.1139/cjes-2018-0025.
Beresi, M.S., Botting, J., Palafox, J.J., and Buitron Sanchez, B.E., 2017, New reticulosan sponges from the middle Cambrian of Sonora, Mexico:
Coulson, K.P., 2016, Microbialite elongation by means of coalescence: an example from the middle Furongian (upper Cambrian) Notch Peak Formation of western Utah: Facies, v. 62, p. 1–17, doi:10.1007/s10347-016-0469-5.
Ergaliev, G., Zhemchuznikov, V., Ergaliev, F., Popov, L., Pour, M., and Bassett, M., 2008, Trilobite biostratigraphy and biodiversity patterns through the Middle-Upper Cambrian transition in the Kyrshabakty Section, Malyi Karatau, Southern Kazakhstan: Advances in trilobite research, p. 91–98.
Hou, M.C., Jiang, W.J., Xing, F.C., Xu, S.L., Liu, X.C., and Xiao, C., 2016, Origin of dolomites in the Cambrian (upper 3rd-Furongian) formation, south-eastern Sichuan Basin, China: Geofluids, v. 16, p. 856–876, doi:10.1111/gfl.12193.
Jago, J.B., Gehling, J.G., Betts, M.J., Brock, G.A., Dalgarno, C.R., Garcia-Bellido, D.C., Haslett, P.G., Jacquet, S.M., Kruse, P.D., and Langsford, N.R., 2020, The Cambrian System in the Arrowie Basin, Flinders Ranges, South Australia: Australian Journal of Earth Sciences, v. 67, p. 923–948.
Jahangir, H., Ghobadi, M., Holmer, L.E., Popov, L.E., Ashuri, A.R., Rushton, A., Tolmacheva, T.Y., and Amini, A., 2015, Biostratigraphy of the Cambrian-Ordovician boundary beds at Kopet-Dagh, Iran: Stratigraphy, v. 12, p. 40–47.
Jahangir, H., Ghobadi Pour, M., Ashuri, A., and Amini, A., 2016, Terminal Cambrian and Early Ordovician (Tremadocian) conodonts from Eastern Alborz, north-central Iran: Alcheringa, v. 40, p. 219–243, doi:10.1080/03115518.2016.1118298.
Latif, K., Xiao, E., Riaz, M., and Hussein, A.A.A., 2019, Calcified cyanobacteria fossils from the leiolitic bioherm in the Furongian Changshan Formation, Datong (North China Platform): Carbonates and Evaporites, v. 34, p. 825–843, doi:10.1007/s13146-018-0472-8.
Lazarenko, N.P., Gogin, I.Y., Pegel, T. V., and Abaimova, G.P., 2011, The kho-nelege section of the ogon’or formation: A potential candidate for the GSSP of stage 10, Cambrian system: Bulletin of Geosciences, v. 86, p. 555–568, doi:10.3140/bull.geosci.1270.
Lee, J.-H., Chen, J., Choh, S.-J., Lee, D.-J., Han, Z., and Chough, S.K., 2014, FURONGIAN (LATE CAMBRIAN) SPONGE–MICROBIAL MAZE-LIKE REEFS IN THE NORTH CHINA PLATFORMFURONGIAN SPONGE–MICROBIAL REEFS: Palaios, v. 29, p. 27–37.
Lee, J.H., Dattilo, B.F., Mrozek, S., Miller, J.F., and Riding, R., 2019, Lithistid sponge-microbial reefs, Nevada, USA: Filling the late Cambrian ‘reef gap’: Palaeogeography, Palaeoclimatology, Palaeoecology, v. 520, p. 251–262, doi:10.1016/j.palaeo.2019.02.003.
Li, D., Zhang, X., Hu, D., Chen, X., Huang, W., Zhang, X., Li, M., Qin, L., Peng, S., and Shen, Y., 2018, Evidence of a large δ13Ccarb and δ13Corg depth gradient for deep-water anoxia during the late Cambrian SPICE event: Geology, v. 46, p. 631–634, doi:10.1130/G40231.1.
Lim, J.N., Chung, G.S., Park, T.-Y.S., and Lee, K.S., 2015, Lithofacies and stable carbon isotope stratigraphy of the Cambrian Sesong Formation in the Taebaeksan Basin, Korea: Journal of the Korean earth science society, v. 36, p. 617–631.
Lundberg, F., 2016, Cambrian stratigraphy and depositional dynamics based on the Tomten-1 drill core, Falbygden, Västergötland, Sweden: Dissertations in Geology at Lund University,.
Mei, M., Latif, K., Mei, C., Gao, J., and Meng, Q., 2020, Thrombolitic clots dominated by filamentous cyanobacteria and crusts of radio-fibrous calcite in the Furongian Changshan Formation, North China: Sedimentary Geology, v. 395, p. 105540, doi:10.1016/j.sedgeo.2019.105540.
Ng, T.W., Botting, J.P., Yuan, J.L., and Lin, J.P., 2015, New discoveries of Cambrian pelmatozoan echinoderm ossicles from North China: Palaeoworld, v. 24, p. 438–444, doi:10.1016/j.palwor.2015.05.008.
Pegel, T.V., 2014, Biofacies and age of Cambrian trilobite associations of the Diringde reef complex (northern Siberian Platform, Russia): Bulletin of Geosciences, p. 335–345, doi:10.3140/bull.geosci.1420.
Peng, S., Babcock, L.E., Zhu, X., Zuo, J., and Dai, T., 2014, A potential GSSP for the base of the uppermost Cambrian stage, coinciding with the first appearance of Lotagnostus americanus at Wa’ergang, Hunan, China: Gff, v. 136, p. 208–213, doi:10.1080/11035897.2013.865666.
Popov, L.E., Bassett, M.G., Holmer, L.E., and Ghobadi Pour, M., 2009, Early ontogeny and soft tissue preservation in siphonotretide brachiopods: New data from the Cambrian-Ordovician of Iran: Gondwana Research, v. 16, p. 151–161, doi:10.1016/j.gr.2009.01.009.
Pratt, B.R., Raviolo, M.M., and Bordonaro, O.L., 2012, Carbonate platform dominated by peloidal sands: lower Ordovician La Silla Formation of the eastern Precordillera, San Juan, Argentina: Sedimentology, v. 59, p. 843–866.
Pruss, S.B., and Knoll, A.H., 2017, Environmental covariation of metazoans and microbialites in the Lower Ordovician Boat Harbour Formation, Newfoundland: Palaeogeography, Palaeoclimatology, Palaeoecology, v. 485, p. 917–929, doi:10.1016/j.palaeo.2017.08.007.
Rasmussen, B.W., Rasmussen, J.A., and Nielsen, A.T., 2016, Biozonation of the Furongian (upper Cambrian) Alum Shale Formation at Hunneberg, Sweden: Gff, v. 138, p. 467–489, doi:10.1080/11035897.2016.1168866.
Riaz, M., Xiao, E., Latif, K., and Zafar, T., 2019, Sequence-stratigraphic position of oolitic bank of Cambrian in North China platform: example from the Kelan section of Shanxi Province: Arabian Journal for Science and Engineering, v. 44, p. 391–407.
Sanei, H., Petersen, H.I., Schovsbo, N.H., Jiang, C., and Goodsite, M.E., 2014, Petrographic and geochemical composition of kerogen in the Furongian (U. Cambrian) Alum Shale, central Sweden: Reflections on the petroleum generation potential: International Journal of Coal Geology, v. 132, p. 158–169, doi:10.1016/j.coal.2014.08.010.
Schiffbauer, J.D., Huntley, J.W., Fike, D.A., Jeffrey, M.J., Gregg, J.M., and Shelton, K.L., 2017, Decoupling biogeochemical records, extinction, and environmental change during the Cambrian SPICE event: Science advances, v. 3, p. e1602158.
Schovsbo, N.H., Nielsen, A.T., Harstad, A.O., and Bruton, D.L., 2018, Stratigraphy and geochemical composition of the Cambrian alum shale formation in the porsgrunn core, Skien-Langesund district, Southern Norway: Bulletin of the Geological Society of Denmark, v. 66, p. 1–20, doi:10.37570/bgsd-2018-66-01.
Scorrer, S., Azmy, K., and Stouge, S., 2019, Carbon-isotope stratigraphy of the furongian berry head formation (Port au port group) and tremadocian watts bight formation (St. George Group), western newfoundland, and the correlative significance1: Canadian Journal of Earth Sciences, v. 56, p. 223–234, doi:10.1139/cjes-2018-0059.
Sial, A.N., Peralta, S., Ferreira, V.P., Toselli, A.J., Aceñolaza, F.G., Parada, M.A., Gaucher, C., Alonso, R.N., and Pimentel, M.M., 2008, Upper Cambrian carbonate sequences of the Argentine Precordillera and the Steptoean C-Isotope positive excursion (SPICE): Gondwana Research, v. 13, p. 437–452.
Sundberg, F.A., Kurkewicz, R., and Rooks, D.L., 2007, Wujiajiania sutherlandi Fauna (Elvinia Biozone, Paibian Stage, Furongian Series—“Upper” Cambrian) from the Emigrant Formation, Nevada: Journal of Paleontology, v. 81, p. 794–796.
Wang, X.-F., Stouge, S., Maletz, J., Bagnoli, G., Qi, Y.-P., Raevskaya, E.G., Wang, C.-S., and Yan, C.-B., 2019, Correlating the global Cambrian–Ordovician boundary: Precise comparison of the Xiaoyangqiao section, Dayangcha, North China with the Green Point GSSP section, Newfoundland, Canada: Palaeoworld, v. 28, p. 243–275.
Zhang, L.-J., Buatois, L.A., Mangano, M.G., Qi, Y.-A., and Tai, C., 2017, Middle Cambrian Diplocraterion parallelum from North China: Ethologic significance and facies controls: Bollettino della Società Paleontologica Italiana, v. 56, p. 118.

## Sheet: Early Ordovician
Region	Section	dolostone (meter)	limestone (meter)	Reference	Dolomite abundance
South Kazakhstan	Batyrbay	25	620	Apollonov et al., 1988	0.0387597
Argentine Precordillera		0	690	Buggisch et al., 2003	0
Neveda, USA	central Egan Range	0	95	Cook et al., 1977	0
Neveda, USA	Hot Creek Range	0	82	Cook et al., 1977	0
east-central New York, USA	Mohawk Valley	60	15	Friedman, 1994	0.8
Western Argentina	Cerro La Silla	7	295	Keller et al., 1994	0.0231788
northern British Columbia, Canada	Grey Peak	0	270	Pyle and Barnes, 2000	0
Kashmir, India	Trahagam	0	290	Shah, 1982	0
Idaho and Utah, USA	Lava Dam North	0	105	Adrain et al., 2002	0
Mississippi, Southern USA	Magnolia	144	332	Alberstadt and Repetski, 1989	0.302521
Kazakhstan	Shabakty	60	190	Gubanov and Peel, 2001	0.24
Kazakhstan	Agalatas	0	330	Gubanov and Peel, 2001	0
Western Newfoundland, Canada		184	230	Azmy et al., 2008	0.444444
Utah, USA	Pyramid	0	5	Benner et al., 2004	0
southwestern Sweden	Diabasbrottet	0	1	Bergström et al., 2004	0
southwestern Sweden	Holsbrotten	0	1	Bergström et al., 2004	0
southwestern Sweden	Mossebo	0	0.5	Bergström et al., 2004	0
Quebec and Ontario, Canada	Oil Laggan NO.1	85	0	Bernstein, 1992	1
Quebec and Ontario, Canada	Oil Laggan NO.186	110	0	Bernstein, 1992	1
Nohawk Valley, New York, USA	Canajoharie Creek	5	30	Braun and Friedman, 1969	0.142857
Nohawk Valley, New York, USA	Flat Creek	10	25	Braun and Friedman, 1969	0.285714
northern Tarim Basin, China	YQ6	180	160	Guo et al., 2016	0.529412
northern Tarim Basin, China	TS2	120	190	Guo et al., 2016	0.387097
North-West Nelson, New Zealand	Mount Patriarch	0	380	Cooper and Druce, 1975	0
northwestern Russia		0	15	Dronov et al., 1995	0
eas-central Korean Peninsula, Korea		0	150	Kim and Lee, 1996	0
Oslo region, Norway	Rognstrand	0	5	Kohut, 1972	0
Oslo region, Norway	Slemmestad	0	9	Kohut, 1972	0
Oslo region,Norway	Hovodden	0	5	Kohut, 1972	0
Oslo region, Norway	Steinsodden Heramb	0	22	Kohut, 1972	0
southern Devon Island, Arctic Archipelago	Line 3	23	29	Landing and Barnes, 1981	0.442308
southern Devon Island, Arctic Archipelago	Line 1	31	32	Landing and Barnes, 1981	0.492063
South Korea	Baegunsan syncline 1	0	125	Lee and Kim, 1992	0
Montana and North Kakota, USA	Shell-SW Richey	0	36	Lochman, 1966	0
Montana and North Kakota, USA	Shell-Pine	0	45	Lochman, 1966	0
Hunneberg, south-central Sweden	Floklev	0	1	Lofgren, 1993	0
Hunneberg, south-central Sweden	Orreholmen	0	3	Lofgren, 1996	0
Hubei, China	Chenjiahe	0	35	Maletz and Kozlowska, 2013	0
southern Great Basin, USA	Red Rock Canyon	154	0	Miller and Zilinsky, 1981	1
NE British Columbia, Canada	Section 2	0	255	Pyle and Barnes, 2003	0
NE British Columbia, Canada	Section 8	180	395	Pyle and Barnes, 2003	0.313043
Great Basin, western USA	Shingle Pass	0	739	Edwards and Saltzman, 2014	0
Great Basin, USA	Ibex	0	768	Edwards and Saltzman, 2014	0
Hebei province, China	Pingquan	20	410	Liu and Zhan, 2009	0.0465116
northern British Columbia, Canada		6	133	Pyle and Barnes, 2001	0.0431655
Oklahoma, USA	Bally Mountain and I-35	0	1330	Edwards and Saltzman, 2015	0
Alborz Mountains, Iran	Deh-Molla	0	6	Pour et al., 2011	0
Tarim Basin, China	Yingshanbeipo	3	70	Yang et al., 2020	0.0410959
Tarim Basin, China	Taibei	419	238	Yang et al., 2020	0.637747
Jilin, NE China	Dayangcha	0	205	Zhang et al., 2004	0
New York and west Vermont, USA	Tremadocian Tribes Hill	40	3	Landing et al., 2012	0.930233
References
Adrain, J.M., Lee, D.-C., Westrop, S.R., Chatterton, B.D.E., and Landing, E., 2002, Classification of the trilobite subfamilies Hystricurinae and Hintzecurinae subfam. nov., with new genera from the Lower Ordovician (Ibexian) of Idaho and Utah: MEMOIRS-QUEENSLAND MUSEUM, v. 48, p. 553–586.
Alberstadt, L., and Repetski, J.E., 1989, A Lower Ordovician sponge/algal facies in the southern United States and its counterparts elsewhere in North America: Palaios, v. 4, p. 225–247.
Apollonov, M.K., Chugaeva, M.N., Dubinina, S. V, and Zhemchuzhnikov, V.G., 1988, Batyrbay section, south Kazakhstan, USSR–Potential stratotype for the Cambrian–Ordovician boundary: Geological Magazine, v. 125, p. 445–449.
Azmy, K., Lavoie, D., Knight, I., and Chi, G., 2008, Dolomitization of the Lower Ordovician Aguathuna Formation carbonates, Port au Port Peninsula, western Newfoundland, Canada: implications for a hydrocarbon reservoir: Canadian Journal of Earth Sciences, v. 45, p. 795–813.
Benner, J.S., Ekdale, A.A., and De Gibert, J.M., 2004, Macroborings (Gastrochaenolites) in Lower Ordovician hardgrounds of Utah: sedimentologic, paleoecologic, and evolutionary implications: Palaios, v. 19, p. 543–550.
Bergström, S.M., and Ahlberg, P., 2004, Guide to some classical Ordovician and Cambrian localities in the Fågelsång area, Scania, southern Sweden, in International Symposium on Early Palaeozoic Palaeogeography and Palaeoclimate, Erlanger geologische Abhandlungen–Sonderband Erlangen, v. 5, p. 81–90.
Bernstein, L., 1992, A revised lithostratigraphy of the Lower–Middle Ordovician Beekmantown Group, St. Lawrence Lowlands, Quebec and Ontario: Canadian Journal of Earth Sciences, v. 29, p. 2677–2694.
Braun, M., and Friedman, G.M., 1969, Carbonate lithofacies and environments of the Tribes Hill Formation (Lower Ordovician) of the Mohawk Valley, New York: Journal of Sedimentary Research, v. 39, p. 113–135.
Buggisch, W., Keller, M., and Lehnert, O., 2003, Carbon isotope record of Late Cambrian to Early Ordovician carbonates of the Argentine Precordillera: Palaeogeography, Palaeoclimatology, Palaeoecology, v. 195, p. 357–373.
Cook, H.E., and Taylor, M.E., 1977, Comparison of continental slope and shelf environments in the Upper Cambrian and lowest Ordovician of Nevada:
Cooper, R.A., and Druce, E.C., 1975, Lower Ordovician sequence and conodonts, Mount Patriarch, North-west Nelson, New Zealand: New Zealand journal of geology and geophysics, v. 18, p. 551–582.
Dronov, A. V, Koren, T.N., Popov, L.E., Tolmacheva, T.J., and Holmer, L.E., 1995, Uppermost Cambrian and Lower Ordovician in northwestern Russia: sequence stratigraphy, sea level changes and bio-events:
Edwards, C.T., and Saltzman, M.R., 2014, Carbon isotope (δ13Ccarb) stratigraphy of the Lower–Middle Ordovician (Tremadocian–Darriwilian) in the Great Basin, western United States: implications for global correlation: Palaeogeography, Palaeoclimatology, Palaeoecology, v. 399, p. 1–20.
Friedman, G.M., 1994, Upper Cambrian-Lower Ordovician (Sauk) platform carbonates of the northern Appalachian (Gondwana) passive margin: Carbonates and Evaporites, v. 9, p. 143.
Gubanov, A.P., and Peel, J.S., 2001, Latest helcionelloid molluscs from the Lower Ordovician of Kazakhstan: Palaeontology, v. 44, p. 681–694.
Guo, C., Chen, D., Qing, H., Dong, S., Li, G., Wang, D., Qian, Y., and Liu, C., 2016, Multiple dolomitization and later hydrothermal alteration on the Upper Cambrian-Lower Ordovician carbonates in the northern Tarim Basin, China: Marine and Petroleum Geology, v. 72, p. 295–316.
Kim, J.C., and Lee, Y. Il, 1996, Marine diagenesis of Lower Ordovician carbonate sediments (Dumugol Formation), Korea: cementation in a calcite sea: Sedimentary Geology, v. 105, p. 241–257.
Kohut, J.J., 1972, Conodont biostratigraphy of the Lower Ordovician Orthoceras and Stein Limestones (3c), Norway: Norsk Geologisk Tidsskrift, v. 52, p. 427–445.
Landing, E., Adrain, J.M., Westrop, S.R., and Kroeger, B., 2012, Tribes Hill–Rochdale formations in east Laurentia: proxies for Early Ordovician (Tremadocian) eustasy on a tropical passive margin (New York and west Vermont): Geological Magazine, v. 149, p. 93–123.
Landing, E., and Barnes, C.R., 1981, Conodonts from the Cape Clay Formation (Lower Ordovician), southern Devon Island, Arctic Archipelago: Canadian Journal of Earth Sciences, v. 18, p. 1609–1628.
Lee, Y. Il, and Kim, J.C., 1992, Storm‐influenced siliciclastic and carbonate ramp deposits, the Lower Ordovician Dumugol Formation, South Korea: Sedimentology, v. 39, p. 951–969.
LIU, J., and ZHAN, R., 2009, Temporal distribution of diagnostic biofabrics in the Lower and Middle Ordovician in North China: Clues to the geobiology of the Great Ordovician Biodiversification Event: Acta Geologica Sinica‐English Edition, v. 83, p. 513–523.
Lochman, C., 1966, Lower Ordovician (Arenig) faunas from the Williston Basin, Montana and North Dakota: Journal of Paleontology, p. 512–548.
Löfgren, A., 1993, Conodonts from the Lower Ordovician at Hunneberg, south-central Sweden: Geological Magazine, v. 130, p. 215–232.
Löfgren, A., 1996, Lower Ordovician conodonts, reworking, and biostratigraphy of the Orreholmen quarry, Västergötland, south‐central Sweden: GFF, v. 118, p. 169–183.
Maletz, J., and Kozłowska, A., 2013, Dendroid graptolites from the Lower Ordovician (Tremadocian) of the Yichang area, Hubei, China: Paläontologische Zeitschrift, v. 87, p. 445–454.
Miller, R.H., and Zilinsky, G.A., 1981, Lower Ordovician through Lower Devonian cratonic margin rocks of the southern Great Basin: Geological Society of America Bulletin, v. 92, p. 255–261.
Pour, M.G., Mohibullah, M., Williams, M., Popov, L.E., and Tolmacheva, T.Y., 2011, New, early ostracods from the Ordovician (Tremadocian) of Iran: systematic, biogeographical and palaeoecological significance: Alcheringa: An Australasian Journal of Palaeontology, v. 35, p. 517–529.
Pyle, L.J., and Barnes, C.R., 2003, Conodonts from a platform-to-basin transect, Lower Ordovician to Lower Silurian, northeastern British Columbia, Canada: Journal of Paleontology, v. 77, p. 146–171.
Pyle, L.J., and Barnes, C.R., 2001, Conodonts from the Kechika Formation and Road River Group (Lower to Upper Ordovician) of the Cassiar Terrane, northern British Columbia: Canadian Journal of Earth Sciences, v. 38, p. 1387–1401.
Pyle, L.J., and Barnes, C.R., 2000, Upper Cambrian to Lower Silurian stratigraphic framework of platform-to-basin fades, northeastern British Columbia: Bulletin of Canadian Petroleum Geology, v. 48, p. 123–149.
Saltzman, M.R., Edwards, C.T., Adrain, J.M., and Westrop, S.R., 2015, Persistent oceanic anoxia and elevated extinction rates separate the Cambrian and Ordovician radiations: Geology, v. 43, p. 807–811, doi:10.1130/G36814.1.
Shah, S.K., 1982, Cambrian stratigraphy of Kashmir and its boundary problems: Precambrian Research, v. 17, p. 87–98.
Sun, X., Heubeck, C., Steiner, M., and Yang, B., 2020, Environmental setting of the Cambrian Terreneuvian rocks from the southwestern Yangtze Platform, South China: Palaeogeography, Palaeoclimatology, Palaeoecology, v. 538, p. 109424.
Zhang, Y., Erdtmann, B.-D., and Feng, H., 2004, Tremadocian (early ordovician) graptolite biostratigraphy of China: Newsletters on Stratigraphy, v. 40, p. 155–182.

## Sheet: Middle Ordovician
Region	Section	dolostone (meter)	limestone (meter)	Reference	Dolomite abundance
northern British Columbia, Canada	Grey Peak	4	72	Pyle and Barnes, 2000	0.0526316
NE British Columbia, Canada	Section 2	122	0	Pyle and Barnes, 2003	1
NE British Columbia, Canada	Section 8	155	0	Pyle and Barnes, 2003	1
Estonia	Tartu 453	0	15	Ainsaar et al., 1999	0
Estonia	Ristiküla 174	0	23	Ainsaar et al., 1999	0
Estonia	Pärnu	0	3	Ainsaar et al., 1999	0
Baltoscandia, Estonia	Jurmalar-1	0	47	Ainsaar et al., 2010	0
Baltoscandia, Estonia	Mehioorma 421	0	41	Ainsaar et al., 2010	0
Baltoscandia, Estonia	Ruhnu 500	0	40	Ainsaar et al., 2010	0
Precordillera of Argentina	Las Aguaditas	0	54	Albanesi et al., 2013	0
Precordillera of Argentina	Chacritas River	0	61	Albanesi et al., 2013	0
South-central Oklahoma, USA	I-35	0	62	Bauer, 1987	0
Quebec City, Canada	Lotbiniere	0	175	Belt and Bussires, 1979	0
Quebec City, Canada	Montmorency Falls	0	147	Belt and Bussires, 1979	0
Quebec City, Canada	Cap Martin	0	335	Belt and Bussires, 1979	0
Easternmost Tennessee, USA	Marble Hollow	0	120	Bergstrom, 1973	0
Easternmost Tennessee, USA	Lenoir City	0	106	Bergstrom, 1973	0
Easternmost Tennessee, USA	St. Clair	0	150	Bergstrom, 1973	0
Östergötland, southern Sweden	Borenshult Drillcore	0	2	Bergström et al., 2011	0
Östergötland, southern Sweden	Smedsby Gard Drillcore	0	3	Bergström et al., 2011	0
Tazewell County, Virginia, USA		0	390	Cooper and Prouty, 1943	0
Great Basin, USA	Shingle Pass	35	460	Edwards and Saltzman, 2014	0.0707071
Great Basin, USA	Ibex	0	280	Edwards and Saltzman, 2014	0
Central Nevada, USA		0	58	Ethington and Schumacher, 1969	0
western Newfoundland, Canada	A-A'	0	86	Fahraeus and Nowlan, 1978	0
western Newfoundland, Canada	K-K'	0	70	Fahraeus and Nowlan, 1978	0
Southern Appalachians, USA	Pratt Ferry, Alabama	0	36	Grahn and Bergstrom, 1984	0
Southern Appalachians, USA	Red Mountain, Alabama	0	20	Grahn and Bergstrom, 1984	0
North Estonian	Mishina Gora	0	36	Hints et al., 2004	0
Scandinavian, Norway	Fjacka	0	40	Jaanusson and Strachan, 1954	0
Scandinavian, Norway	Boda Hamn	0	18	Jaanusson and Strachan, 1954	0
Scandinavian, Norway	Norra Skagen	0	20	Jaanusson and Strachan, 1954	0
USA	Richardson Mountains	35	160	Jackson, 1964	0.179487
Tarim basin, NW China	well S76	0	58	Jin et al., 2009	0
Argentine Precordillera	Sa de los Pozos	0	210	Keller et al., 1993	0
Illinois Basin, USA	Sangamon Co. IL	0	15	Kolata et al., 1998	0
Ozark Dome, USA	St. Louis Co. Mo	0	13	Kolata et al., 1998	0
Cicinnati Arch, USA	Switzerland Co. IN	0	13	Kolata et al., 1998	0
Hebei province, China	Pingquan	90	120	Liu and Zhan, 2009	0.428571
Baltoscandia, Sweden	Hallekis	0	2.5	Mellgren and Erikson, 2009	0
Iowa, USA	Cominco SS-9	0	30	Pancost et al., 1998	0
East Baltic, Estonia	Putilovo Quarry	0	8	Rasmussen et al., 2009	0
East Baltic, Estonia	Saka	0	1	Rasmussen et al., 2009	0
Neveda, USA	Monitor Range–Antelope Range	0	372	Saltzman and Young, 2005	0
Kinnekulle, southern Sweden	Thorsberg quarry	0	3	Schmitz and Haggstrom, 2006	0
Hunan, China	Maocaopu	0	23	Schmitz et al., 2010	0
Hubei, China	Puxi River	0	18	Schmitz et al., 2010	0
Yichang, China	Huanghuachang	0	15	Wang et al., 2015	0
Yichang, China	Chenjiahe	0	7	Wang et al., 2015	0
southern Ontario, Canada		5	140	Brookfield and Brett, 1988	0.0344828
Baltoscandia, Estonia	Laeva-13	0	50	Kiipli et al., 2010	0
Baltoscandia, Estonia	Nar	0	43	Kiipli et al., 2010	0
Baltoscandia, Estonia	Aizpute-41	0	45	Kiipli et al., 2010	0
References
Ainsaar, L., Kaljo, D., Martma, T., Meidla, T., Männik, P., Nõlvak, J., and Tinn, O., 2010, Middle and Upper Ordovician carbon isotope chemostratigraphy in Baltoscandia: a correlation standard and clues to environmental history: Palaeogeography, Palaeoclimatology, Palaeoecology, v. 294, p. 189–201.
Ainsaar, L., Meidla, T., and Martma, T., 1999, Evidence for a widespread carbon isotopic event associated with late Middle Ordovician sedimentological and faunal changes in Estonia: Geological Magazine, v. 136, p. 49–62.
Albanesi, G.L., Bergström, S.M., Schmitz, B., Serra, F., Feltes, N.A., Voldman, G.G., and Ortega, G., 2013, Darriwilian (Middle Ordovician) δ13Ccarb chemostratigraphy in the Precordillera of Argentina: Documentation of the middle Darriwilian Isotope Carbon Excursion (MDICE) and its use for intercontinental correlation: Palaeogeography, Palaeoclimatology, Palaeoecology, v. 389, p. 48–63.
Bauer, J.A., 1987, Conodonts and conodont biostratigraphy of the McLish and Tulip Creek formations (Middle Ordovician) of south-central Oklahoma: University of Oklahoma, v. 141.
Belt, E.S., Riva, J., and Bussières, L., 1979, Revision and correlation of late Middle Ordovician stratigraphy northeast of Quebec City: Canadian Journal of Earth Sciences, v. 16, p. 1467–1483.
Bergström, S.M., 1973, Biostratigraphy and facies relations in the lower Middle Ordovician of easternmost Tennessee: American Journal of Science, v. 273, p. 261–293.
Bergström, S.M., and Ahlberg, P., 2004, Guide to some classical Ordovician and Cambrian localities in the Fågelsång area, Scania, southern Sweden, in International Symposium on Early Palaeozoic Palaeogeography and Palaeoclimate, Erlanger geologische Abhandlungen–Sonderband Erlangen, v. 5, p. 81–90.
Bergström, S.M., Calner, M., Lehnert, O., and Noor, A., 2011, A new upper Middle Ordovician–Lower Silurian drillcore standard succession from Borenshult in Östergötland, southern Sweden: 1. Stratigraphical review with regional comparisons: GFF, v. 133, p. 149–171.
Brookfield, M.E., and Brett, C.E., 1988, Paleoenvironments of the Mid-Ordovician (Upper Caradocian) Trenton limestones of southern Ontario, Canada: Storm sedimentation on a shoal-basin shelf model: Sedimentary Geology, v. 57, p. 75–105.
COOPER, B.N., and PROUTY, C.E., 1943, Stratigraphy of the Lower Middle Ordovician of Tazewell County, Virginia: Bulletin of the Geological Society of America, v. 54, p. 819–886.
Edwards, C.T., and Saltzman, M.R., 2014, Carbon isotope (δ13Ccarb) stratigraphy of the Lower–Middle Ordovician (Tremadocian–Darriwilian) in the Great Basin, western United States: implications for global correlation: Palaeogeography, Palaeoclimatology, Palaeoecology, v. 399, p. 1–20.
Ethington, R.L., and Schumacher, D., 1969, Conodonts of the Copenhagen Formation (middle Ordovician) in central Nevada: Journal of Paleontology, p. 440–484.
Fåhræus, L.E., and Nowlan, G.S., 1978, Franconian (Late Cambrian) to early Champlainian (Middle Ordovician) conodonts from the Cow Head Group, western Newfoundland: Journal of Paleontology, p. 444–471.
Grahn, Y., and Bergström, S.M., 1984, Lower Middle Ordovician Chitinozoa from the southern Appalachians, United States: Review of Palaeobotany and Palynology, v. 43, p. 89–122.
Hints, L., and Miidel, A., 2004, Late Ordovician ripple marks in Vasalemma quarry, NW Estonia, in WOGOGOB-2004 8th Meeting on the Working Group on the Ordovician Geology of Baltoscandia May 13–18, 2004, Tallinn and Tartu, Estonia Organising Comittee, p. 39.
Jaanusson, V., and Strachan, I., 1954, Correlation of the Scandinavian Middle Ordovician with the graptolite succession: Geologiska Föreningen i Stockholm Förhandlingar, v. 76, p. 684–696.
Jackson, D.E., 1964, Observations on the sequence and correlation of Lower and Middle Ordovician graptolite faunas of North America: Geological Society of America Bulletin, v. 75, p. 523–534.
Jin, Z., Zhu, D., Hu, W., Zhang, X., Zhang, J., and Song, Y., 2009, Mesogenetic dissolution of the middle Ordovician limestone in the Tahe oilfield of Tarim basin, NW China: Marine and Petroleum Geology, v. 26, p. 753–763.
Keller, M., Eberlein, S., and Lehnert, O., 1993, Sedimentology of Middle Ordovician carbonates in the Argentine Precordillera: evidence of regional relative sea-level changes: Geologische Rundschau, v. 82, p. 362–377.
Kiipli, E., Kiipli, T., Kallaste, T., and Ainsaar, L., 2010, Distribution of phosphorus in the Middle and Upper Ordovician Baltoscandian carbonate palaeobasin: Estonian Journal of Earth Sciences, v. 59, p. 247.
Kolata, D.R., Huff, W.D., and Bergström, S.M., 1998, Nature and regional significance of unconformities associated with the Middle Ordovician Hagan K-bentonite complex in the North American midcontinent: Geological Society of America Bulletin, v. 110, p. 723–739.
LIU, J., and ZHAN, R., 2009, Temporal distribution of diagnostic biofabrics in the Lower and Middle Ordovician in North China: Clues to the geobiology of the Great Ordovician Biodiversification Event: Acta Geologica Sinica‐English Edition, v. 83, p. 513–523.
Mellgren, J.I.S., and Eriksson, M.E., 2009, Untangling a Darriwilian (Middle Ordovician) palaeoecological event in Baltoscandia: conodont faunal changes across the ‘Täljsten’interval: Earth and Environmental Science Transactions of the Royal Society of Edinburgh, v. 100, p. 353–370.
Pancost, R.D., Freeman, K.H., Patzkowsky, M.E., Wavrek, D.A., and Collister, J.W., 1998, Molecular indicators of redox and marine photoautotroph composition in the late Middle Ordovician of Iowa, USA: Organic Geochemistry, v. 29, p. 1649–1662.
Pyle, L.J., and Barnes, C.R., 2003, Conodonts from a platform-to-basin transect, Lower Ordovician to Lower Silurian, northeastern British Columbia, Canada: Journal of Paleontology, v. 77, p. 146–171.
Pyle, L.J., and Barnes, C.R., 2000, Upper Cambrian to Lower Silurian stratigraphic framework of platform-to-basin fades, northeastern British Columbia: Bulletin of Canadian Petroleum Geology, v. 48, p. 123–149.
Rasmussen, C.M.Ø., Nielsen, A.T., and Harper, D.A.T., 2009, Ecostratigraphical interpretation of lower Middle Ordovician East Baltic sections based on brachiopods: Geological Magazine, v. 146, p. 717–731.
Saltzman, M.R., and Young, S.A., 2005, Long-lived glaciation in the Late Ordovician? Isotopic and sequence-stratigraphic evidence from western Laurentia: Geology, v. 33, p. 109–112.
Schmitz, B., Bergström, S.M., and Xiaofeng, W., 2010, The middle Darriwilian (Ordovician) δ13C excursion (MDICE) discovered in the Yangtze Platform succession in China: implications of its first recorded occurrences outside Baltoscandia: Journal of the Geological Society, v. 167, p. 249–259.
Schmitz, B., and Häggström, T., 2006, Extraterrestrial chromite in Middle Ordovician marine limestone at Kinnekulle, southern Sweden—Traces of a major asteroid breakup event: Meteoritics & Planetary Science, v. 41, p. 455–466.
Wang, Y., Dong, D., Li, X., Huang, J., Wang, S., and Wu, W., 2015, Stratigraphic sequence and sedimentary characteristics of Lower Silurian Longmaxi Formation in Sichuan Basin and its peripheral areas: Natural Gas Industry B, v. 2, p. 222–232.

## Sheet: Late Ordovician
Region	Section	dolostone (meter)	limestone (meter)	Reference	Dolomite abundance
NE British Columbia, Canada	Section 8	75	30	Pyle and Barnes, 2003	0.714286
NE British Columbia, Canada	Section 3	175	0	Pyle and Barnes, 2003	1
NE British Columbia, Canada	Section 3	110	0	Pyle and Barnes, 2003	1
Baltoscandia, Estonia	Jurmalar-1	0	83	Ainsaar et al., 2010	0
Baltoscandia, Estonia	Valga 10	0	53	Ainsaar et al., 2010	0
Baltoscandia, Estonia	Mehioorma 421	0	51	Ainsaar et al., 2010	0
Baltoscandia, Estonia	Mannamaa F-367	0	122	Ainsaar et al., 2010	0
East Baltic, Estonia	Kaugatuma	0	43	Hints et al., 2004	0
East Baltic, Estonia	Parnu	0	57	Hints et al., 2004	0
East Baltic, Estonia	Valga 10	0	42	Hints et al., 2004	0
Anticosti Island, Canada	Pointe Laframboise	0	105	Achab et al., 2011	0
Cape Girardeau , USA	Copenhagen Canyon	0	40	Bergström et al., 2006	0
Cape Girardeau , USA	Vinini Creek	0	15	Bergström et al., 2006	0
SW Estonia	Ruhnu Core	0	18	Bergström et al., 2006	0
Furuberget, Norway		0	95	Bergström et al., 2010a	0
Kentucky, USA		0	28	Bergström et al., 2010a	0
Hubei Province, China	Puxihe	0	12	Bergström et al., 2010a	0
Cincinnati, USA		0	322	Bergström et al., 2010b	0
Arbuckle Mountains, Oklahoma, USA		0	310	Bergström et al., 2010b	0
Webster County, Lowa, USA	Peterson NO.1 Drill-core	80	3	Bergström et al., 2010b	0.963855
southeastern Estonia	Mehikoorma Core	31	28	Bergström et al., 2010b	0.525424
Eina Quarry, Toten, Estonia		0	67	Bergström et al., 2011	0
Rodelokken Shore, Oslo, Norway		0	7	Bergström et al., 2011	0
south-central Sweden	Fjacka	0	14	Bergström et al., 2011	0
Amtjarn and Skalberget, Estonia		0	60	Bergström et al., 2011	0
Mt. Kinnekulle	Mossen	0	220	Bergström et al., 2011	0
Gullhogen Quarry		0	510	Bergström et al., 2011	0
Tennessee, USA	Composite section	0	32	Bergström et al., 2012	0
Mifflin County, Pennsylvania, USA	Reedsville	0	152	Bergström et al., 2012	0
New York, USA	Dexter Quarry	0	14	Bergström et al., 2012	0
Antelope Valley, Nevada, USA		0	115	Bergström et al., 2012	0
Smedsby Gård, Sweden		0	18	Bergström et al., 2012	0
East Baltic	Riekstini	0	7	Brenchley et al., 2003	0
East Baltic	Kaugatuma	0	10	Brenchley et al., 2003	0
East Baltic	Kardla	0	28	Brenchley et al., 2003	0
Baltoscandia	Laeva-13	0	80	Kiipli et al., 2010	0
Baltoscandia	Assamalla-256	0	45	Calner et al., 2010	0
Guizhou province, China	Baiguowan	0	8	Xu et al., 2010	0
Anhui province, China	Xiaotan	0	9	Xu et al., 2010	0
Stony Mountain, Manitoba	Winnipeg quarry	5	1	Elias, 1981	0.833333
central North America	Southeastern Saskatchewan	62	10	Fanton et al., 2002	0.861111
central North America	Central lowa	130	5	Fanton et al., 2002	0.962963
central Nevada, USA	Monitor Range	0	130	Finney et al., 1999	0
Southeastern Oklahoma, USA	Black Knob Ridge	0	25	Goldman et al., 2007	0
Illinois Basin, USA	NJZ J-9 Parrish core	25	0	Guthrie and Pratt, 1994	1
Girvan, Scotland		0	160	Hubert, 1966	0
Baltoscandia, Estonia	Nar	0	40	Kiipli et al., 2010	0
Baltoscandia, Estonia	Aizpute-41	0	95	Kiipli et al., 2010	0
Canadian Arctic Islands, Canada	Truro Island	0	22	Melchin, 1987	0
Canadian Arctic Islands, Canada	Irene Bay	10	5	Melchin, 1987	0.666667
Canadian Arctic Islands, Canada	Huff Ridge	0	15	Melchin, 1987	0
central Kazakhstan	Sortan-Manai	0	87	Nikitin and Popov, 1996	0
West Balkhash , Kazakhstan	Kujandysal	0	90	Popov et al., 2002	0
northern British Columbia, Canada		0	93	Pyle and Barnes, 2001	0
central Sweden	Osmundsberget	0	32	Schmitz and Bergström, 2007	0
central Nevada, USA	Line Mountain	45	32	Sweet, 2000	0.584416
Spiti Valley, Northern India	Pin	10	190	Suttner and Ernst, 2007	0.05
Malopolska Block, Poland	Mojca	0	10	Trela, 2005	0
Malopolska Block, Poland	Bukowka 1	0	12	Trela, 2005	0
References
Achab, A., Asselin, E., Desrochers, A., Riva, J.F., and Farley, C., 2011, Chitinozoan biostratigraphy of a new Upper Ordovician stratigraphic framework for Anticosti Island, Canada: Bulletin, v. 123, p. 186–205.
Ainsaar, L., Kaljo, D., Martma, T., Meidla, T., Männik, P., Nõlvak, J., and Tinn, O., 2010, Middle and Upper Ordovician carbon isotope chemostratigraphy in Baltoscandia: a correlation standard and clues to environmental history: Palaeogeography, Palaeoclimatology, Palaeoecology, v. 294, p. 189–201.
Albanesi, G.L., Bergström, S.M., Schmitz, B., Serra, F., Feltes, N.A., Voldman, G.G., and Ortega, G., 2013, Darriwilian (Middle Ordovician) δ13Ccarb chemostratigraphy in the Precordillera of Argentina: Documentation of the middle Darriwilian Isotope Carbon Excursion (MDICE) and its use for intercontinental correlation: Palaeogeography, Palaeoclimatology, Palaeoecology, v. 389, p. 48–63.
Bergström, S.M., Calner, M., Lehnert, O., and Noor, A., 2011, A new upper Middle Ordovician–Lower Silurian drillcore standard succession from Borenshult in Östergötland, southern Sweden: 1. Stratigraphical review with regional comparisons: GFF, v. 133, p. 149–171.
Bergström, S.M., Lehnert, O., Calner, M., and Joachimski, M.M., 2012, A new upper Middle Ordovician–Lower Silurian drillcore standard succession from Borenshult in Östergötland, southern Sweden: 2. Significance of δ13C chemostratigraphy: Gff, v. 134, p. 39–63.
BERGSTRÖM, S.M., Saltzman, M.M., and Schmitz, B., 2006, First record of the Hirnantian (Upper Ordovician) δ13C excursion in the North American Midcontinent and its regional implications: Geological Magazine, v. 143, p. 657–678.
Bergström, S.M., Schmitz, B., Young, S.A., and Bruton, D.L., 2010, The δ 13 C chemostratigraphy of the Upper Ordovician Mjøsa Formation at Furuberget near Hamar, southeastern Norway: Baltic, Trans-Atlantic, and Chinese relations.: Norwegian Journal of Geology/Norsk Geologisk Forening, v. 90.
Brenchley, P.J., Carden, G.A., Hints, L., Kaljo, D., Marshall, J.D., Martma, T., Meidla, T., and Nõlvak, J., 2003, High-resolution stable isotope stratigraphy of Upper Ordovician sequences: Constraints on the timing of bioevents and environmental changes associated with mass extinction and glaciation: Geological Society of America Bulletin, v. 115, p. 89–104.
Calner, M., Lehnert, O., and Nõlvak, J., 2010, Palaeokarst evidence for widespread regression and subaerial exposure in the middle Katian (Upper Ordovician) of Baltoscandia: significance for global climate: Palaeogeography, Palaeoclimatology, Palaeoecology, v. 296, p. 235–247.
Elias, R.J., 1982, Paleoecology and biostratinomy of solitary rugose corals in the Stony Mountain Formation (Upper Ordovician), Stony Mountain, Manitoba: Canadian Journal of Earth Sciences, v. 19, p. 1582–1598.
Fanton, K.C., Holmden, C., Nowlan, G.S., and Haidl, F.M., 2002, 143Nd/144Nd and Sm/Nd stratigraphy of Upper Ordovician epeiric sea carbonates: Geochimica et Cosmochimica Acta, v. 66, p. 241–255.
Finney, S.C., Berry, W.B.N., Cooper, J.D., Ripperdan, R.L., Sweet, W.C., Jacobson, S.R., Soufiane, A., Achab, A., and Noble, P.J., 1999, Late Ordovician mass extinction: a new perspective from stratigraphic sections in central Nevada: Geology, v. 27, p. 215–218.
Goldman, D., Leslie, S.A., Nõlvak, J., Young, S., Bergström, S.M., and Huff, W.D., 2007, The global stratotype section and point (GSSP) for the base of the Katian Stage of the Upper Ordovician Series at Black Knob Ridge, southeastern Oklahoma, USA: Episodes, v. 30.
Guthrie, J.M., and Pratt, L.M., 1994, Geochemical indicators of depositional environment and source-rock potential for the Upper Ordovician Maquoketa Group, Illinois Basin: AAPG bulletin, v. 78, p. 744–757.
Hints, L., and Miidel, A., 2004, Late Ordovician ripple marks in Vasalemma quarry, NW Estonia, in WOGOGOB-2004 8th Meeting on the Working Group on the Ordovician Geology of Baltoscandia May 13–18, 2004, Tallinn and Tartu, Estonia Organising Comittee, p. 39.
Hubert, J.F., 1966, Sedimentary history of upper Ordovician geosynclinal rocks, Girvan, Scotland: Journal of Sedimentary Research, v. 36, p. 677–699.
Kiipli, E., Kiipli, T., Kallaste, T., and Ainsaar, L., 2010, Distribution of phosphorus in the Middle and Upper Ordovician Baltoscandian carbonate palaeobasin: Estonian Journal of Earth Sciences, v. 59, p. 247.
Melchin, M.J., 1987, Upper Ordovician graptolites from the Cape Phillips Formation, Canadian Arctic Islands: Bulletin of the Geological Society of Denmark, v. 35, p. 191–202.
Nikitin, I.F., and Popov, L.E., 1996, Strophomenid and triplesiid brachiopods from an Upper Ordovician carbonate mound in central Kazakhstan: Alcheringa, v. 20, p. 1–20.
Popov, L.E., Cocks, L.R.M., and Nikitin, I.F., 2002, Upper Ordovician brachiopods from the Anderken Formation, Kazakhstan: their ecology and systematics: Bulletin of the Natural History Museum: Geology Series, v. 58, p. 13–79.
Pyle, L.J., and Barnes, C.R., 2003, Conodonts from a platform-to-basin transect, Lower Ordovician to Lower Silurian, northeastern British Columbia, Canada: Journal of Paleontology, v. 77, p. 146–171.
Pyle, L.J., and Barnes, C.R., 2001, Conodonts from the Kechika Formation and Road River Group (Lower to Upper Ordovician) of the Cassiar Terrane, northern British Columbia: Canadian Journal of Earth Sciences, v. 38, p. 1387–1401.
Schmitz, B., and Bergström, S.M., 2007, Chemostratigraphy in the Swedish Upper Ordovician: regional significance of the Hirnantian δ13C excursion (HICE) in the Boda Limestone of the Siljan region: GFF, v. 129, p. 133–140.
Schmitz, B., Bergström, S.M., and Xiaofeng, W., 2010, The middle Darriwilian (Ordovician) δ13C excursion (MDICE) discovered in the Yangtze Platform succession in China: implications of its first recorded occurrences outside Baltoscandia: Journal of the Geological Society, v. 167, p. 249–259.
Suttner, T.J., and Ernst, A., 2007, Upper Ordovician bryozoans of the Pin Formation (Spiti Valley, northern India): Palaeontology, v. 50, p. 1485–1518.
Sweet, W.C., 2000, Conodonts and biostratigraphy of Upper Ordovician strata along a shelf to basin transect in central Nevada: Journal of Paleontology, v. 74, p. 1148–1160.
Trela, W., 2005, Condensation and phosphatization of the Middle and Upper Ordovician limestones on the Malopolska Block (Poland): Response to paleoceanographic conditions: Sedimentary Geology, v. 178, p. 219–236.
Xu, C., Bergstroem, S.M., Yuandong, Z., Goldman, D., and Qing, C., 2010, Upper Ordovician (Sandbian–Katian) graptolite and conodont zonation in the Yangtze region, China: Earth and Environmental Science Transactions of the Royal Society of Edinburgh, v. 101, p. 111–134.

## Sheet: Llandovery
Region	Section	dolostone (meter)	limestone (meter)	Reference	Dolomite abundance
NE British Columbia, Canada	Section 3	102	795	Pyle and Barnes, 2003	0.113712
NE British Columbia, Canada	Section 6	290	20	Pyle and Barnes, 2003	0.935484
Saaremaa, Estonia	Ohesaare core	0	130	Loydell and Mannik, 1998	0
south-central Sweden	Osmundsberget North	0	5	Bergstrom et al., 1998	0
Röstånga, S. Sweden	Röstånga 1 core	0	4	Bergstrom et al., 1999	0
Tungusskaja Syneclise, Russia	Fat'Yanikha River	0	3	Bogolepova and Kriz, 1995	0
Eastern Siberia, Russia	Mojero River	0	60	Bogolepova, 1995	0
Anticosti Island, Quebec, Canada		0	290	Brunton et al., 1994	0
Anticosti Island, Quebec, Canada		0	50	Desrochers et al.,, 2007	0
Gotland, Sweden	File Haidarborrningen 1	0	28	Grahn, 1995	0
Rocky Mountains, British Columbia, Canada	Pedley Pass	260	240	Jin et al., 1989	0.52
Manitoulin Island, Ontario, Canada		68	0	Johnson, 1981	1
Lowa, USA		118	0	Johnson, 1985	1
Michigan, USA		146	0	Johnson, 1985	1
Mnaitoulin, USA		102	0	Johnson, 1985	1
Bruce Pen, USA		50	0	Johnson, 1985	1
New York, USA		110	0	Johnson, 1985	1
E. Anticosti, USA		0	563	Johnson, 1985	0
Ohio and Kentucky, USA	West Union	2	0	Sullivan et al., 2016	1
Ohio and Kentucky, USA	Drowing Creek West	2	0	Sullivan et al., 2016	1
South China	Hanjiadian	0	93	Johnson, 1985	0
South China	Longjingpo	0	145	Johnson, 1985	0
South China	Dazhongba	0	138	Johnson, 1985	0
Podolia, Ukraine	Kitaigorod 30	0	42	Kaljo et al., 2007	0
Podolia, Ukraine	Bagovitsa 120a	2	30	Kaljo et al., 2007	0.0625
Podolia, Ukraine	Muksha 33	15	8	Kaljo et al., 2007	0.652174
Latvia, Russia	Kolka-54 core	0	50	Loydell et al., 2010	0
Nunavut, Canada	Cape Manning 2	15	0	Macdonald, 2004	1
Nunavut, Canada	Cape Phillips	0	230	Macdonald, 2004	0
Oslo Region, Norway	Skien	0	63	Moller, 1988	0
Oslo Region, Norway	Holmestrand	0	60	Moller, 1988	0
Oslo Region, Norway	Oslo	0	72	Moller, 1988	0
Oslo Region, Norway	Asker	0	105	Moller, 1988	0
Oslo Region, Norway	Ringerike	0	48	Moller, 1988	0
Guizhou Province, China	Tongzi	0	170	Opdyke et al., 1987	0
northern Ontario, Canada	Attawapiskat Rive	0.5	12	Suchy and Stearn, 1992	0.04
Estonia	Kalana quarry	0	8	Tinn et al., 2015	0
Eastern Baltic Basin， Western Lithuania	Viduklė-61 core	35	0	Venckutė-Aleksienė et al., 2016	1
Anticosti Island, Quebec, Canada	Ruisseau de la Chute	0	110	Zhang et al., 2002	0
Estonia	Ikla	0	175	Gouldey, 2010	0
western Anticosti Island, Canada		0	30	Bartlett et al., 2018	0
Shaanxi, China		0	35	Yuan et al., 2020	0
Mackenzie Mountains, N.W.T., Canada	AV4	0	194	Johnston and Chatterton, 1983	0
Mackenzie Mountains, N.W.T., Canada	AV2	14	138	Johnston and Chatterton, 1983	0.0921053
Mackenzie Mountains, N.W.T., Canada	AV1	58	236	Johnston and Chatterton, 1983	0.197279
east central Iran	Derenjal Mountains	3	86	Hairapetian et al., 2011	0.0337079
Estonia	Laeva-13 Core	0	120	Kiipli et al., 2012	0
New Brunswick	South Charlo River	0	100	Lee and Noble, 1977	0
New Brunswick	Dickie Cove Black Point	0	145	Lee and Noble, 1977	0
northern Canada	Pat Lake	0	15	Lenz and Mccracken, 1982	0
Iowa, USA	Garrison Core	34	103	Waid and Cramer, 2017	0.248175
Iowa, USA	SS-10 Core	176	0	Waid and Cramer, 2017	1
Roberts Mountains area, NV, USA	Pete Hanson Creek II	0	4	Young et al., 2019	0
Barrandian area, Czech Republic	RadotÌn tunnel	2.5	0	Fryda and Storch, 2014	1
References
Bartlett, R., Elrick, M., Wheeley, J.R., Polyak, V., Desrochers, A., and Asmerom, Y., 2018, Abrupt global-ocean anoxia during the Late Ordovician–early Silurian detected using uranium isotopes of marine carbonates: Proceedings of the National Academy of Sciences, v. 115, p. 5896–5901.
Bergström, S.M., Huff, W.D., and Kolata, D.R., 1998, The Lower Silurian Osmundsberg K-bentonite. Part I: stratigraphic position, distribution, and palaeogeographic significance: Geological Magazine, v. 135, p. 1–13.
Bergström, S.M., Huff, W.D., Koren’, T., Larsson, K., Ahlberg, P., and Kolata, D.R., 1999, The 1997 core drilling through Ordovician and Silurian strata at Röstånga, S. Sweden: preliminary stratigraphic assessment and regional comparison: GFF, v. 121, p. 127–135.
BOGoLEPovA, O.K., 1995, Lower Silurian cephalopod limestones from the Mojero River section (Eastern Siberia, Russia) and their paleogeographic relationships: Jahrbuch der geologischen Bundesanstalt, v. 138, p. 155.
Bogolepova, O.K., and Kříž, J., 1995, Ancestral forms of Bohemian type Bivalvia from the lower Silurian of Siberia (Tungusskaja Syneclise, Russia): Geobios, v. 28, p. 691–699.
Brunton, F.R., and Copper, P., 1994, Paleoecologic, temporal, and spatial analysis of early Silurian reefs of the Chicotte Formation, Anticosti Island, Quebec, Canada: Facies, v. 31, p. 57–79.
Desrochers, A., Bourque, P.-A., and Neuweiler, F., 2007, Diagenetic versus biotic accretionary mechanisms of bryozoan–sponge buildups (Lower Silurian, Anticosti Island, Canada): Journal of Sedimentary Research, v. 77, p. 564–571.
Frýda, J., and Storch, P., 2014, Carbon isotope chemostratigraphy of the Llandovery in northern peri-Gondwana: new data from the Barrandian area, Czech Republic: Estonian Journal of Earth Sciences, v. 63, p. 220.
Gouldey, J.C., Saltzman, M.R., Young, S.A., and Kaljo, D., 2010, Strontium and carbon isotope stratigraphy of the Llandovery (Early Silurian): Implications for tectonics and weathering: Palaeogeography, Palaeoclimatology, Palaeoecology, v. 296, p. 264–275.
Grahn, Y., 1995, Lower Silurian Chitinozoa and biostratigraphy of subsurface Gotland: GFF, v. 117, p. 57–65.
Hairapetian, V., Mohibullah, M., Tilley, L.J., Williams, M., Miller, C.G., Afzal, J., Pour, M.G., and Hejazi, S.H., 2011, Early Silurian carbonate platform ostracods from Iran: a peri-Gondwanan fauna with strong Laurentian affinities: Gondwana Research, v. 20, p. 645–653.
Jin, J., Caldwell, W.G.E., and Norford, B.S., 1989, Rhynchonellid brachiopods from the Upper Ordovician–Lower Silurian Beaverfoot and Nonda formations of the Rocky Mountains, British Columbia: Geological Survey of Canada, Bulletin, v. 396, p. 21–59.
Johnson, M.E., 1981, Correlation of Lower Silurian strata from the Michigan Upper Peninsula to Manitoulin Island: Canadian Journal of Earth Sciences, v. 18, p. 869–883.
Johnson, M.E., Jia-Yu, R., and Xue-Chang, Y., 1985, Intercontinental correlation by sea-level events in the Early Silurian of North America and China (Yangtze Platform): Geological Society of America Bulletin, v. 96, p. 1384–1397.
Johnston, D.I., and Chatterton, B.D.E., 1983, Some silicified Middle Silurian rostroconchs (Mollusca) from the Mackenzie Mountains, NWT, Canada: Canadian Journal of Earth Sciences, v. 20, p. 844–858.
Kaljo, D., Grytsenko, V., Martma, T., and Mõtus, M.-A., 2007, Three global carbon isotope shifts in the Silurian of Podolia (Ukraine): stratigraphical implications: Estonian Journal of Earth Sciences, v. 56, p. 205–220.
Kiipli, E., Kiipli, T., Kallaste, T., and Siir, S., 2012, Al2O3/TiO2 ratio of the clay fraction of Late Ordovician–Silurian carbonate rocks as an indicator of paleoclimate of the Fennoscandian Shield: Palaeogeography, Palaeoclimatology, Palaeoecology, v. 365, p. 312–320.
Lee, H.J., and Noble, J.P.A., 1977, Silurian stratigraphy and oppositional environments: Charlo–Upsalquitch Forks area, New Brunswick: Canadian Journal of Earth Sciences, v. 14, p. 2533–2542.
Lenz, A.C., and McCracken, A.D., 1982, The Ordovician–Silurian boundary, northern Canadian Cordillera: graptolite and conodont correlation: Canadian Journal of Earth Sciences, v. 19, p. 1308–1322.
Loydell, D.K., Kaljo, D., and Männik, P., 1998, Integrated biostratigraphy of the lower Silurian of the Ohesaare core, Saaremaa, Estonia: Geological Magazine, v. 135, p. 769–783.
Loydell, D.K., Nestor, V., and Männik, P., 2010, Integrated biostratigraphy of the lower Silurian of the Kolka-54 core, Latvia: Geological Magazine, v. 147, p. 253–280.
MacDONALD, E.W., 2004, Palaeoscenidiidae (Radiolaria) from the Lower Silurian of the Cape Phillips Formation, Cornwallis Island, Nunavut, Canada: Journal of Paleontology, v. 78, p. 257–274.
MÖLLER, N.K., and Kvingan, K., 1988, The genesis of nodular limestones in the Ordovician and Silurian of the Oslo Region (Norway): Sedimentology, v. 35, p. 405–420.
Opdyke, N.D., Huang, K., Xu, G., Zhang, W.Y., and Kent, D. V, 1987, Paleomagnetic results from the Silurian of the Yangtze paraplatform: Tectonophysics, v. 139, p. 123–132.
Pyle, L.J., and Barnes, C.R., 2003, Conodonts from a platform-to-basin transect, Lower Ordovician to Lower Silurian, northeastern British Columbia, Canada: Journal of Paleontology, v. 77, p. 146–171.
Suchy, D.R., and Stearn, C.W., 1993, Lower Silurian reefs and post-reef beds of the Attawapiskat Formation, Hudson Bay Platform, northern Ontario: Canadian Journal of Earth Sciences, v. 30, p. 575–590.
Sullivan, N.B., McLaughlin, P.I., Brett, C.E., Cramer, B.D., Kleffner, M.A., Thomka, J.R., and Emsbo, P., 2016, Sequence boundaries and chronostratigraphic gaps in the Llandovery of Ohio and Kentucky: The record of early Silurian paleoceanographic events in east-central North America: Geosphere, v. 12, p. 1813–1832.
Tinn, O., Mastik, V., Ainsaar, L., and Meidla, T., 2015, Kalania pusilla, an exceptionally preserved non-calcified alga from the lower Silurian (Aeronian, Llandovery) of Estonia: Palaeoworld, v. 24, p. 207–214.
Venckutė-Aleksienė, A., Radzevičius, S., and Spiridonov, A., 2016, Dynamics of phytoplankton in relation to the upper Homerian (Lower Silurian) lundgreni event–an example from the Eastern Baltic Basin (Western Lithuania): Marine Micropaleontology, v. 126, p. 31–41.
Waid, C.B.T., and Cramer, B.D., 2017, Global chronostratigraphic correlation of the Llandovery Series (Silurian System) in Iowa, USA, using high-resolution carbon isotope (δ 13 C carb) chemostratigraphy and brachiopod and conodont biostratigraphy.: Bulletin of Geosciences, v. 92.
Young, S.A., Kleinberg, A., and Owens, J.D., 2019, Geochemical evidence for expansion of marine euxinia during an early Silurian (Llandovery–Wenlock boundary) mass extinction: Earth and Planetary Science Letters, v. 513, p. 187–196.
Yuan, W.-W., Zhou, Z.-Q., Zhou, Z.-Y., and Li, Q.-J., 2020, Proetid trilobites from the middle Telychian (Llandovery, Silurian) Ningqiang Formation, Shaanxi, China: Palaeoworld,.
Zhang, S., Barnes, C.R., and Pohler, S.M.L., 2002, Relationships between lithofacies belts and conodont faunas, Gun River Formation (Lower Silurian), Anticosti Island, Quebec: a statistical approach: Canadian Journal of Earth Sciences, v. 39, p. 1767–1782.

## Sheet: Wenlock
Region	Section	dolostone (meter)	limestone (meter)	Reference	Dolomite abundance
Nevada, USA	Roberts Mountains,	0	66	Cramer and Saltzman, 2005	0
Tennessee, USA	Newsom Roadcut,	0	12	Cramer and Saltzman, 2005	0
Lowa, USA	IPSCO Core	60	0	Cramer and Saltzman, 2005	1
Ohio, USA	Hillsboro	0	5	Cramer et al., 2010	0
Ohio, USA	Piqua Quarry	3	0	Cramer and Saltzman, 2005	1
Saaremaa, Estonia	Ohesaare borehole	10	32	Viira and Aldridge, 1998	0.238095
Gotland, Sweden	Vallstena Are	0	17	Calner et al., 2004	0
Nashville, TN, USA	Newsom Roadcut	0	13	Cramer and Saltzman, 2007	0
Bolivia	Quebrada Colorada	0	1.5	Díaz-Martínez et al., 2007	0
Bolivia	Sacta River	0	2.9	Díaz-Martínez et al., 2007	0
Gotland, Sweden		0	30	Eriksson, 2004	0
Podolia, Western Ukraine		14	5	Jarochowska et al., 2014	0.736842
Herefordshire, UK	Whitmanís Hill	0	5	Pabler al., 2014	0
Lithuania	Vidukle-6	50	0	Radzevičius et al., 2014	1
Estonia		25	35	Richardson et al., 2019	0.416667
New York, USA	Robert Moses Power Plant S-1 core,	0	13	Cramer et al., 2010	0
New York, USA		60	0	Shukla and Friedman, 1983	1
Roberts Mountains area, Neveda, USA	Pete Hanson Creek II	0	30	Young et al., 2019	0
Barrandian area, Bohemia	Prague Basin	0	45	Dufka, 1995	0
SW Sardinia, Italy		0	17	Ferretti et al., 1998	0
Dudley, England, UK		0	21	Ray and Thomas, 2007	0
SW Ukraine	Kytayhorod	0	30	Wrona and Lis, 2012	0
Carnic Alps, Austria	Cellon	0	4	Brett et al., 2009	0
Carnic Alps, Austria	Rauchkofel Boden	0	1	Brett et al., 2009	0
Lithuanian	Vilkaviškis-134 core	32	112	Radzevičius et al., 2016	0.222222
TN, USA	Newsom Roadcut	0	12	Cramer and Saltzman, 2007	0
Eastern Lithuania	Ledai-179	5	55	Radzevičius et al., 2014	0.0833333
western Ukraine	Bagovytsya	3	11	Jarochowska et al., 2016	0.214286
western Ukraine	Muksha 2	2	1	Jarochowska et al., 2016	0.666667
England, UK	Gurney's Quarry	0	6	Ray et al., 2013	0
England, UK	Upper Vinesend	0	13	Ray et al., 2013	0
NW Turkey	Istanbul	0	100	Sachanski et al., 2008	0
NW Turkey	Izmit	0	10	Sachanski et al., 2008	0
NW Turkey	Safranbolu	0	20	Sachanski et al., 2008	0
eastern Poland	Widowo IG-1 core	0	45	Jarochowska et al., 2015	0
Lithuania	Ohesaare	19	64	Kiipli et al., 2014	0.228916
Gotland, Sweden	Tallbacken-1 core	0	25	Radomski, 2018	0
Wales, UK	Wenlock Edge	0	26	Marshall et al., 2012	0
Wales, UK	West Midlands	0	34	Marshall et al., 2012	0
Peru	Kozel	0	61	Frýda and Frýdova, 2016	0
Peru	Kozel Syncline	0	23	Frýda and Frýdova, 2016	0
Gotland, Sweden	Gothemshammar 9	0	2	Jarochowska et al., 2016	0
central England, UK	wren's Nest Hill	0	16	Ray et al., 2010	0
central England, UK	Sports Centre	0	7	Ray et al., 2010	0
central England, UK	Wolfverhampton	0	9	Ray et al., 2010	0
Latvia	Ohesaare	6	13	Nestor, 2007	0.315789
Latvia	Kolka-54	50	10	Nestor, 2007	0.833333
Perunica, Czech Republic	Kozel	0	61	Fryda and Frydova, 2016	0
Cornwallis Island, Canada	Cape Phillips North	0	85	Zhang et al., 2017	0
Cornwallis Island, Canada	Abbott River East	0	32	Zhang et al., 2017	0
Cornwallis Island, Canada	Abbott River West	0	40	Zhang et al., 2017	0
Wales and the Welsh Borderland, UK	Ludlow	0	109	Hurst et al., 1978	0
Wales and the Welsh Borderland, UK	Dudley	0	60	Hurst et al., 1978	0
Ohesaare, Estonia	Ohesaare	22	57	Kaljo et al., 1997	0.278481
References
Brett, C.E., Ferretti, A., Histon, K., and Schönlaub, H.P., 2009, Silurian sequence stratigraphy of the Carnic Alps, Austria: Palaeogeography, Palaeoclimatology, Palaeoecology, v. 279, p. 1–28.
Calner, M., Jeppsson, L., and Eriksson, M.J., 2004, Ytterholmen revisited–implications for the Late Wenlock stratigraphy of Gotland and coeval extinctions: GFF, v. 126, p. 231–241.
Cramer, B.D., Kleffner, M.A., Brett, C.E., McLaughlin, P.I., Jeppsson, L., Munnecke, A., and Samtleben, C., 2010, Paleobiogeography, high-resolution stratigraphy, and the future of Paleozoic biostratigraphy: Fine-scale diachroneity of the Wenlock (Silurian) conodont Kockelella walliseri: Palaeogeography, Palaeoclimatology, Palaeoecology, v. 294, p. 232–241.
Cramer, B.D., and Saltzman, M.R., 2007, Early Silurian paired δ13Ccarb and δ13Corg analyses from the Midcontinent of North America: Implications for paleoceanography and paleoclimate: Palaeogeography, Palaeoclimatology, Palaeoecology, v. 256, p. 195–203.
Cramer, B.D., and Saltzman, M.R., 2005, Sequestration of 12C in the deep ocean during the early Wenlock (Silurian) positive carbon isotope excursion: Palaeogeography, Palaeoclimatology, Palaeoecology, v. 219, p. 333–349.
Dufka, P., 1995, Upper Wenlock miospores and cryptospores derived from a Silurian volcanic island in the Prague Basin (Barrandian area, Bohemia): Journal of Micropalaeontology, v. 14, p. 67–79.
Eriksson, M.J., 2004, Formation and significance of a middle Silurian ravinement surface on Gotland, Sweden: Sedimentary Geology, v. 170, p. 163–175.
Ferretti, A., Corradini, C., and Serpagli, E., 1998, The Silurian and Devonian sequence in SW Sardinia: Sardinia Guide− book, ECOS VII. Giornale di Geologia, v. 60, p. 57–61.
Frýda, J., and Frýdová, B., 2016, The Homerian (late Wenlock, Silurian) carbon isotope excursion from Perunica: Does dolomite control the magnitude of the carbon isotope excursion? Canadian Journal of Earth Sciences, v. 53, p. 695–701.
Hurst, J.M., Hancock, N.J., and McKerrow, W.S., 1978, Wenlock stratigraphy and palaeogeography of Wales and the Welsh Borderland: Proceedings of the Geologists’ Association, v. 89, p. 197–226.
Jarochowska, E., Bremer, O., Heidlas, D., Pröpster, S., Vandenbroucke, T.R.A., and Munnecke, A., 2016, End-Wenlock terminal Mulde carbon isotope excursion in Gotland, Sweden: integration of stratigraphy and taphonomy for correlations across restricted facies and specialized faunas: Palaeogeography, Palaeoclimatology, Palaeoecology, v. 457, p. 304–322.
Jarochowska, E., and Munnecke, A., 2016, Late Wenlock carbon isotope excursions and associated conodont fauna in the Podlasie Depression, eastern Poland: a not‐so‐big crisis? Geological Journal, v. 51, p. 683–703.
Jarochowska, E., Munnecke, A., and Kozłowski, W., 2014, An unusual microbial-rostroconch assemblage from the Mulde Event (Homerian, middle Silurian) in Podolia, Western Ukraine: GFF, v. 136, p. 120–124.
Kaljo, D., Kiipli, T., and Martma, T., 1997, Carbon isotope event markers through the Wenlock–Pridoli sequence at Ohesaare (Estonia) and Priekule (Latvia): Palaeogeography, Palaeoclimatology, Palaeoecology, v. 132, p. 211–223.
Kiipli, T., Radzevicius, S., and Kallaste, T., 2014, Silurian bentonites in Lithuania: correlations based on sanidine phenocryst composition and graptolite biozonation--interpretation of volcanic source regions.: Estonian Journal of Earth Sciences, v. 63.
Marshall, C., Thomas, A.T., Boomer, I., and Ray, D.C., 2012, High resolution δ13C stratigraphy of the Homerian (Wenlock) of the English Midlands and Wenlock Edge: Bulletin of Geosciences, v. 87, p. 669–679.
Nestor, V., 2007, Chitinozoans in the Wenlock--Ludlow boundary beds of the East Baltic.: Estonian Journal of Earth Sciences, v. 56.
Päßler, J.-F., Jarochowska, E., Ray, D.C., Munnecke, A., and Worton, G., 2014, Aphanitic buildup from the onset of the Mulde Event (Homerian, middle Silurian) at Whitman’s Hill, Herefordshire, UK: ultrastructural insights into proposed microbial fabrics.: Estonian Journal of Earth Sciences, v. 63.
Radomski, J., 2018, Carbonate sedimentology and carbon isotope stratigraphy of the Tallbacken-1 core, early Wenlock Slite Group, Gotland, Sweden: Dissertations in Geology at Lund University,.
Radzevičius, S., Spiridonov, A., Brazauskas, A., Dankina, D., Rimkus, A., Bičkauskas, G., Kaminskas, D., Meidla, T., and Ainsaar, L., 2016, Integrated stratigraphy, conodont turnover and palaeoenvironments of the upper Wenlock and Ludlow in the shallow marine succession of the Vilkaviškis-134 core (Lithuania): Newsletters on Stratigraphy, v. 49, p. 321–336.
Radzevičius, S., Spiridonov, A., Brazauskas, A., Norkus, A., Meidla, T., and Ainsaar, L., 2014, Upper Wenlock δ 13 C chemostratigraphy, conodont biostratigraphy and palaeoecological dynamics in the Ledai-179 drill core (Eastern Lithuania).: Estonian Journal of Earth Sciences, v. 63.
Ray, D.C., Brett, C.E., Thomas, A.T., and Collings, A.V.J., 2010, Late Wenlock sequence stratigraphy in central England: Geological Magazine, v. 147, p. 123–144.
Ray, D.C., Richards, T.D., Brett, C.E., Morton, A., and Brown, A.M., 2013, Late Wenlock sequence and bentonite stratigraphy in the Malvern, Suckley and Abberley Hills, England: Palaeogeography, Palaeoclimatology, Palaeoecology, v. 389, p. 115–127.
Ray, D.C., and Thomas, A.T., 2007, Carbonate depositional environments, sequence stratigraphy and exceptional skeletal preservation in the Much Wenlock Limestone Formation (Silurian) of Dudley, England: Palaeontology, v. 50, p. 197–222.
Richardson, J.A., Keating, C., Lepland, A., Hints, O., Bradley, A.S., and Fike, D.A., 2019, Silurian records of carbon and sulfur cycling from Estonia: The importance of depositional environment on isotopic trends: Earth and Planetary Science Letters, v. 512, p. 71–82.
Sachanski, V., Goencueoglu, M.C., and Gedik, I., 2008, Wenlock (Silurian) graptolitic shales from the Kocaeli Peninsula (Derince–Izmit), NWTurkey: Acta Geologica Polonica, v. 58, p. 387–393.
Shukla, V., and Friedman, G.M., 1983, Dolomitization and diagenesis in a shallowing-upward sequence; the Lockport Formation (Middle Silurian), New York State: Journal of Sedimentary Research, v. 53, p. 703–717.
Viira, V., and Aldridge, R.J., 1998, Upper Wenlock to Lower Přídolí (Silurian) conodont biostratigraphy of Saaremaa, Estonia, and a correlation with Britain: Journal of Micropalaeontology, v. 17, p. 33–50.
Wrona, R., and Lis, P., 2012, Silurian succession within the Lower Paleozoic Basin of Podolia: Geoshale 2012, Recent Advances in Geology of Fine-Grained Sediments, FieldtripGuidebook, p. 255–259.
Young, S.A., Kleinberg, A., and Owens, J.D., 2019, Geochemical evidence for expansion of marine euxinia during an early Silurian (Llandovery–Wenlock boundary) mass extinction: Earth and Planetary Science Letters, v. 513, p. 187–196.
Zhang, S., Jowett, D.M.S., and Barnes, C.R., 2017, Hirnantian (Ordovician) through Wenlock (Silurian) conodont biostratigraphy, bioevents, and integration with graptolite biozones, Cape Phillips Formation slope facies, Cornwallis Island, Canadian Arctic Islands: Canadian Journal of Earth Sciences, v. 54, p. 936–960.

[truncated: 26 more sheets: Ludlow-Pridoli, Early Devonian, Middle Devonian, Late Devonian, Tournaisian-Visean, Serpukhovian, Bashkirian, Moscovian-Gzhelian, Cisuralian, Guadalupian, Lopingian, Early Triassic, Middle Triassic, Late Triassic, Early Jurassic, Middle Jurassic, Late Jurassic, Berriasian-Barremian, Aptian-Albian, Cenomanian-Coniacian …]
